# Supplementary material for: Efficient access to a designed phosphapalladacycle catalyst via enantioselective catalytic asymmetric hydrophosphination
Source: Royal Society of Chemistry journal article supplement (doi:10.1039/c6dt04447f), 2016-12-27
Supplement: c6dt04447f1.pdf [file c6dt04447f1.pdf]

**Efficient Access to A Designer Phosphapalladacycle Catalyst  
via Enantioselective Catalytic Asymmetric Hydrophosphination**

**Xi-Rui Li, Xiang-Yuan Yang, Yongxin Li, Sumod A. Pullarkat, Pak-Hing Leung\***

<sup>[a]</sup> Division of Chemistry & Biological Chemistry, School of Physical and Mathematical Sciences, Nanyang Technological University, Singapore 637371, Singapore Fax: (+65) 6791 1961; e-mail: pakhing@ntu.edu.sg.

**Supporting Information**

|                                                                  |               |
|------------------------------------------------------------------|---------------|
| <b><u>Table of Contents</u></b>                                  | <b>S1</b>     |
| <b>General Information</b>                                       | <b>S2</b>     |
| <b>Experimental Section</b>                                      | <b>S2-7</b>   |
| <b>Reference</b>                                                 | <b>S7</b>     |
| <b>NMR Spectra</b>                                               | <b>S8-20</b>  |
| <b>HPLC Spectra</b>                                              | <b>S21-29</b> |
| <b>Selected Bond Lengths (Å) of Complexes 12b, 13, 15 and 20</b> | <b>S30</b>    |
| <b>Crystallographic Data</b>                                     | <b>S31-46</b> |

## General Information

All reactions were carried out under a positive pressure of nitrogen using standard Schlenk technique. NMR spectra were recorded on Bruker AV 300, AV500 and BBFO 400 spectrometers. Chemical shifts were reported in ppm and referenced to an internal SiMe<sub>4</sub> standard (0 ppm) for <sup>1</sup>H NMR, chloroform-*d* (77.00 ppm) for <sup>13</sup>C NMR, and an external 85% H<sub>3</sub>PO<sub>4</sub> for <sup>31</sup>P{<sup>1</sup>H} NMR. Acetonitrile (MeCN), dichloromethane (DCM), chloroform, *n*-hexane, acetone, ethyl acetate (EA) and methanol (MeOH) were purchased from their respective companies and used as supplied. Tetrahydrofuran (THF) was distilled from sodium/benzophenone prior to use. Solvents were degassed when necessary. A Low Temp Pairstirrer PSL-1800 was used for controlling low temperature reactions. Column chromatography was carried out with Silica gel 60 (Merck). Melting points were measured using SRS Optimelt Automated Point System SRS MPA100. Optical rotation were measured with JASCO P-1030 Polarimeter in the specified solvent in a 0.1 dm cell at 22.0°C. The enantioselectivities of the hydrophosphination reactions were determined with Agilent 1200 Series High Performance Liquid Chromatography (HPLC) machine fitted with a Daicel Chiralpak IC column and eluted with a mixture of *n*-hexane/2-propanol at 23°C.

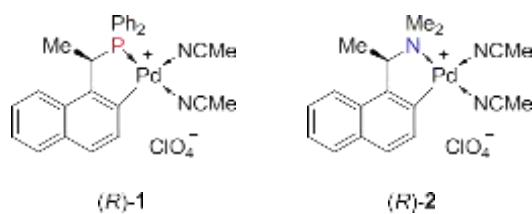

**Figure s1.** Molecular structures of PC-catalyst **1** and NC-catalyst **2**.

**Caution!** Perchlorate salts of metal complexes are potentially explosive compounds and should be handled with care.

The PC-catalyst **1**,<sup>1</sup> NC-catalyst **2**,<sup>2</sup> benzylamine palladium complex **11**<sup>3</sup> and unsaturated malonate **9**<sup>4</sup> were prepared according to literature methods. All other reactants and reagents were used as supplied without further purification unless stated otherwise.

### General procedure for asymmetric hydrophosphination with PC-catalyst (*R*)-1.

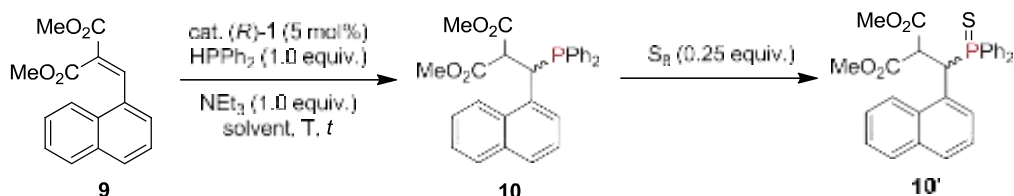

**Scheme s1.** Catalytic asymmetric hydrophosphination of malonate **9**.

A Schlenk tube was charged with Ph<sub>2</sub>PH (20.0 mg, 0.107 mmol, 1.0 equiv), catalyst (*R*)-**1** (3.37 mg, 5.37 μmol, 5 mol%) in solvent (6 mL) and stirred at the stipulated temperature. The substrate **9** (31.9 mg, 0.118 mmol, 1.1 equiv) and NEt<sub>3</sub> (14.9 μL, 0.107 mmol, 1.0 equiv.) was added and stirred. The reaction was monitored for completion by <sup>31</sup>P{<sup>1</sup>H} NMR, then

allowed to warm up to RT and treated with S<sub>8</sub> (6.92 mg, 0.027 mmol, 0.25 equiv.). Volatiles were removed under reduced pressure and the crude product was purified by silica gel column chromatography (1 EA : 15 *n*-hexane) to afford phosphine sulfide **10'** as a white solid in 91% isolated yield. [ $\alpha$ ]<sub>D</sub> = +10.1 (*c* 0.68, DCM, Table 1, Entry 7). Mp: 167-168°C. <sup>31</sup>P{<sup>1</sup>H} NMR (CDCl<sub>3</sub>, 162 MHz):  $\delta$  50.9; <sup>1</sup>H NMR (CDCl<sub>3</sub>, 400 MHz):  $\delta$  8.34-6.76 (m, 17H, Ar), 5.76 (dd, 1H, *J* = 10.8, 8.2 Hz, *CH*COO), 4.98 (dd, 1H, *J* = 12.6, 10.8 Hz, *CH*P), 3.20 (s, 3H, *CH*<sub>3</sub>), 3.15 (s, 3H, *CH*<sub>3</sub>); <sup>13</sup>C NMR (CDCl<sub>3</sub>, 100 MHz):  $\delta$  167.6-167.2 (2C, COO), 133.4-122.6 (22C, Ar), 54.8 (d, 1C, *J* = 4.5 Hz, *CH*<sub>3</sub>), 52.4 (d, 2C, *J* = 7.4 Hz, *CH*<sub>3</sub>), 39.0 (d, 1C, *J* = 50.0 Hz, *PCH*). The *ee* was determined on a Daicel Chiralpak IC column with *n*-hexane/2-propanol = 95/5, flow = 0.5 mL/min, wavelength = 280 nm. Retention times: 66.8 min (*R*), 76.6 min (*S*).

### Synthesis of complex (*S*)-**12a**

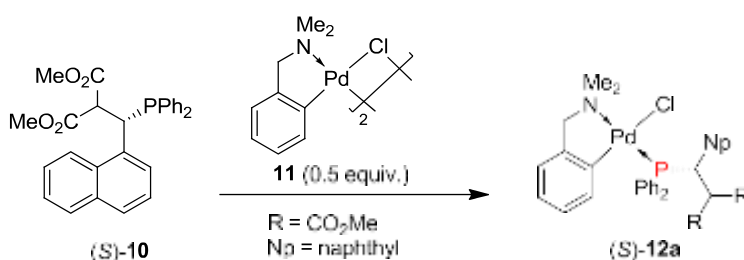

**Scheme s2.** Synthesis of coordination complex (*S*)-**12a**.

The volatiles from the crude reaction mixture containing phosphine **10** (1.0 equiv.) were removed under reduced pressure. The residue was redissolved in DCM (10 mL), dimeric complex **11** (0.5 equiv.) was added and stirred at RT for 10 mins. The organic product was extracted with DCM (3 x 50 mL), washed with H<sub>2</sub>O (1 x 50 mL), dried over MgSO<sub>4</sub> and filtered. The volatiles were removed by rotary evaporator to afford **12a** as a yellow solid in 99% isolated yield. [ $\alpha$ ]<sub>D</sub> = -21.9 (*c* 1.33, DCM). <sup>31</sup>P{<sup>1</sup>H} NMR (CDCl<sub>3</sub>, 162 MHz):  $\delta$  48.3; <sup>1</sup>H NMR (CDCl<sub>3</sub>, 400 MHz):  $\delta$  7.96 (d, 1H, *J* = 8.6 Hz, Ar), 7.89 (dd, 2H, *J* = 11.1, 7.5 Hz, Ar), 7.68-7.64 (m, 3H, Ar), 7.45 (dd, 2H, *J* = 9.9, 8.4 Hz, Ar), 7.31-7.17 (m, 6H, Ar), 6.89 (td, 3H, *J* = 8.0, 2.0 Hz, Ar), 6.84 (d, 1H, *J* = 7.0 Hz, Ar), 6.63 (t, 1H, *J* = 7.2 Hz, Ar), 6.15 (t, 1H, *J* = 7.6 Hz, Ar), 6.09 (t, 1H, *J* = 10.6 Hz, *PCH*), 5.86 (t, 1H, *J* = 7.0 Hz, Ar), 5.53 (t, 1H, *J* = 10.7 Hz, *CH*(CO<sub>2</sub>CH<sub>2</sub>)<sub>2</sub>), 4.48 (d, 1H, *J* = 13.2 Hz, *NCH*<sub>2</sub>), 3.56 (s, 3H, CO<sub>2</sub>CH<sub>3</sub>), 3.59 (dd, 1H, *J* = 13.2, 3.4 Hz, *NCH*<sub>2</sub>), 3.07-3.05 (m, 6H, *NCH*<sub>3</sub>), 2.72 (s, 3H, CO<sub>2</sub>CH<sub>3</sub>); <sup>13</sup>C NMR (CDCl<sub>3</sub>, 100 Hz):  $\delta$  169.0 (s, 1C, CO<sub>2</sub>CH<sub>3</sub>), 168.0 (d, 1C, *J* = 14.9 Hz, CO<sub>2</sub>CH<sub>3</sub>), 152.2-121.8 (28C, Ar), 73.3 (s, 1C, *NCH*<sub>2</sub>), 56.3 (d, 1C, *J* = 9.2 Hz, *CH*(CO<sub>2</sub>CH<sub>3</sub>)<sub>2</sub>), 52.8 (s, 1C, CO<sub>2</sub>CH<sub>3</sub>), 52.0 (s, 1C, CO<sub>2</sub>CH<sub>3</sub>), 51.4 (s, 1C, *NCH*<sub>3</sub>), 48.9 (s, 1C, *NCH*<sub>3</sub>), 40.2 (d, 1C, *J* = 22.5 Hz, *PCH*). HRMS (+ESI) *m/z*: (*M* + *H*)<sup>+</sup> calcd for C<sub>37</sub>H<sub>38</sub>ClNO<sub>4</sub>PPd, 732.1262; found, 732.1296. Anal. Calcd for C<sub>37</sub>H<sub>37</sub>ClNO<sub>4</sub>PPd: C, 60.67; H, 5.09; N, 1.91. Found: C, 60.81; H, 5.56; N, 2.00%.

### Synthesis of complex (S)-12b

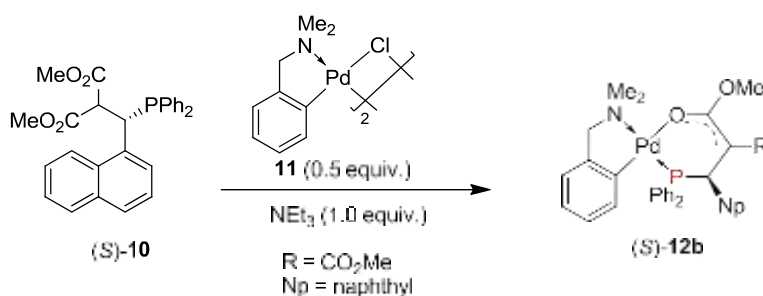

**Scheme s3.** Synthesis of P-O bidentate complex (S)-12b.

The dimeric complex **11** (0.5 equiv.) was added into the crude reaction mixture containing phosphine **10** (1.0 equiv.) and stirred for 10 mins. The volatiles were removed under reduced pressure to afford the crude residue which on standing overnight, crystallized to form complex **12b** as a yellow block in 75% yield.  $[\alpha]_D = -176.8$  (*c* 0.59, DCM). Mp: 121-122°C (dec.).  $^{31}\text{P}\{^1\text{H}\}$  NMR (CDCl<sub>3</sub>, 162 MHz):  $\delta$  60.2;  $^1\text{H}$  NMR (CDCl<sub>3</sub>, 400 MHz):  $\delta$  8.66 (d, 1H, *J* = 7.2 Hz, Ar), 8.31-8.26 (m, 2H, Ar), 7.84 (d, 1H, *J* = 8.7 Hz, Ar), 7.64-7.54 (m, 5H, Ar), 7.44 (t, 1H, *J* = 7.7 Hz, Ar), 7.17 (t, 1H, *J* = 7.4 Hz, Ar), 7.02 (t, 1H, *J* = 7.5 Hz, Ar), 6.94 (d, 1H, *J* = 7.3 Hz, Ar), 6.88 (t, 1H, *J* = 7.5 Hz, Ar), 6.83-6.78 (m, 3H, Ar), 6.63 (td, 2H, *J* = 7.9, 1.9 Hz, Ar), 6.39-6.29 (m, 2H, Ar), 6.33 (d, 1H, *J* = 29.2 Hz, PCH), 4.43 (d, 1H, *J* = 13.8 Hz, NCH<sub>2</sub>), 3.72 (s, 3H, CH<sub>3</sub>O<sub>2</sub>C), 3.67 (dd, 1H, *J* = 13.9, 3.3 Hz, NCH<sub>2</sub>), 3.56 (s, 3H, CH<sub>3</sub>O<sub>2</sub>C), 3.09 (d, 3H, *J* = 2.9 Hz, NCH<sub>3</sub>), 2.83 (s, 3H, NCH<sub>3</sub>);  $^{13}\text{C}$  NMR (CDCl<sub>3</sub>, 100 MHz):  $\delta$  172.2 (d, *J* = 2.4 Hz, 1C, CO<sub>2</sub>CH<sub>3</sub>), 169.7 (d, *J* = 7.5 Hz, 1C, CO<sub>2</sub>CH<sub>3</sub>), 148.4-122.4 (29C, Ar), 71.1 (d, 1C, *J* = 2.9 Hz, NCH<sub>2</sub>), 51.7 (s, 1C, CH<sub>3</sub>CO<sub>2</sub>), 50.5 (s, 1C, CH<sub>3</sub>CO<sub>2</sub>), 49.8 (d, 1C, *J* = 2.2 Hz, NCH<sub>3</sub>), 48.8 (d, 1C, *J* = 2.4 Hz, NCH<sub>3</sub>), 36.5 (d, 1C, *J* = 29.2 Hz, PCH). HRMS (+ESI) *m/z*: (M + H)<sup>+</sup> calcd for C<sub>37</sub>H<sub>37</sub>NO<sub>4</sub>PPd, 696.1495; found, 696.1514.

### Synthesis of dimeric complex (S)-13

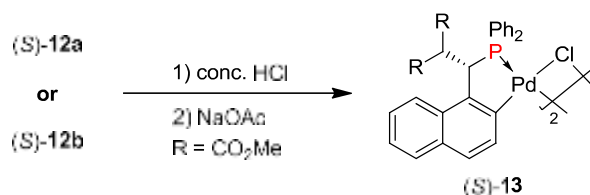

**Scheme s4.** Synthesis of dimeric complex (S)-13.

The complex **12a** (0.10 g, 136.5  $\mu\text{mol}$ ) or **12b** (0.10 g, 143.2  $\mu\text{mol}$ ), conc. HCl (0.6 mL) in acetone (6 mL) was refluxed for 90 mins. The solvent was removed, and the residue was extracted with DCM (3 x 25 mL), washed with H<sub>2</sub>O (1 x 25 mL), dried over MgSO<sub>4</sub> and filtered. The volatiles were removed under reduced pressure. The crude residue and NaOAc (0.40 g) was refluxed in EtOH (20 mL) for 30 mins. After removal of the solvent, the organic layer was taken up in DCM (3 x 25 mL), washed with H<sub>2</sub>O (1 x 25 mL), dried over MgSO<sub>4</sub> and filtered. The crude product was purified by column chromatography (1 DCM : 1 *n*-hexane) to afford complex **13** as a yellow solid in 92% isolated yield. Recrystallization of complex **13** was achieved from a mixture of DCM/*n*-hexane in 84% yield.  $[\alpha]_D = +5.6$  (*c*

0.64, DCM). Mp: 180-181°C (dec.).  $^{31}\text{P}\{^1\text{H}\}$  NMR ( $\text{CDCl}_3$ , 162 MHz):  $\delta$  62.9, 62.3;  $^1\text{H}$  NMR ( $\text{CDCl}_3$ , 400 MHz):  $\delta$  8.01-7.33 (m, 16H, Ar), 5.69-5.63 (m, 1H,  $\text{CHCOO}$ ), 4.38-4.33 (m, 1H,  $\text{PCH}$ ), 3.2 (s, 3H,  $\text{CH}_3$ ), 2.8 (s, 3H,  $\text{CH}_3$ );  $^{13}\text{C}$  NMR ( $\text{CDCl}_3$ , 100 MHz):  $\delta$  167.8 (2C,  $\text{CO}_2\text{CH}_3$ ), 136.0-124.7 (22C, Ar), 53.4 (s, 2C,  $\text{CO}_2\text{CH}_3$ ), 52.2 (d, 1C,  $J = 19.0$  Hz,  $\text{PCH}$ ). HRMS (+ESI)  $m/z$ :  $(\text{M} + \text{H})^+$  calcd for  $\text{C}_{56}\text{H}_{49}\text{Cl}_2\text{O}_8\text{P}_2\text{Pd}_2$ , 1193.0349; found, 1193.0323.

### Synthesis of complex (S)-14

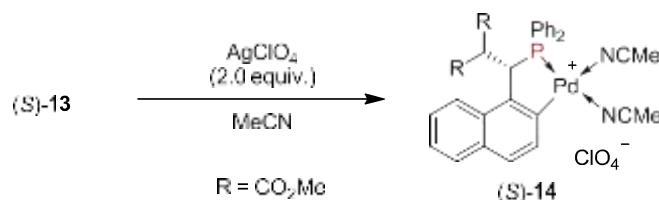

**Scheme s5.** Synthesis of monomeric bisacetonitrile complex (S)-14.

The dimeric complex **13** (0.10 g, 83.7  $\mu\text{mol}$ , 1.0 equiv.) and  $\text{AgClO}_4$  (34.7 mg, 167.4  $\mu\text{mol}$ , 2.0 equiv.) in MeCN (10ml) was stirred for 2 h in the dark. The reaction mixture was filtered through celite and the volatiles were removed. Extraction was performed with DCM (3 x 25 mL), the combined organic layer was washed with  $\text{H}_2\text{O}$  (1 x 25 mL), dried over  $\text{MgSO}_4$  and filtered. The solvent was removed by rotary evaporator to give complex **14** as a yellow solid in 99% isolated yield.  $[\alpha]_{\text{D}} = +357.7$  ( $c$  0.15, DCM). Mp: 81-82°C (dec.).  $^{31}\text{P}\{^1\text{H}\}$  NMR ( $\text{CDCl}_3$ , 162 MHz):  $\delta$  61.5;  $^1\text{H}$  NMR ( $\text{CDCl}_3$ , 400 MHz):  $\delta$  7.97-7.86 (m, 2H, Ar), 7.75-7.65 (m, 4H, Ar), 7.58-7.35 (m, 10H, Ar), 5.68-5.37 (m, 1H,  $\text{PCH}$ ), 4.17 (dd, 1H,  $J = 17.6, 9.4$  Hz,  $\text{CH}(\text{CO}_2\text{CH}_3)_2$ ), 3.24 (s, 3H,  $\text{CO}_2\text{CH}_3$ ), 2.83 (s, 3H,  $\text{CO}_2\text{CH}_3$ ), 2.22 (m, 6H,  $\text{NCCH}_3$ );  $^{13}\text{C}$  NMR ( $\text{CDCl}_3$ , 100 MHz):  $\delta$  167.2 (s, 1C,  $\text{CO}_2\text{CH}_3$ ), 166.8 (d, 1C,  $J = 15.0$  Hz,  $\text{CO}_2\text{CH}_3$ ), 148.8-123.7 (22C, Ar), 55.3 (d, 1C,  $J = 5.6$  Hz,  $\text{CHCO}_2\text{CH}_3$ ), 52.3 (d, 2C,  $J = 23.7$  Hz,  $\text{CO}_2\text{CH}_3$ ), 48.0 (d, 1C,  $J = 38.0$  Hz,  $\text{PCH}$ ), 2.5 (s, 2C,  $\text{NCCH}_3$ ). HRMS (+ESI)  $m/z$ :  $(\text{M} + \text{H})^+$  calcd for  $\text{C}_{32}\text{H}_{31}\text{ClN}_2\text{O}_8\text{PPd}$ , 743.0541; found, 743.0546.

### Synthesis of complex (S)-15

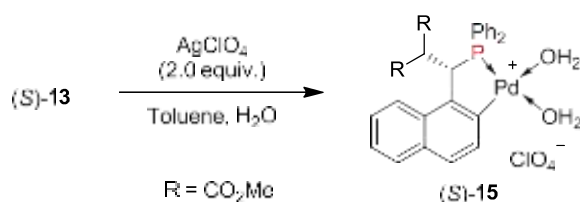

**Scheme s6.** Synthesis of monomeric bis-aquo complex (S)-15.

The dimeric complex **13** (0.10 g, 83.7  $\mu\text{mol}$ , 1.0 equiv.) and  $\text{AgClO}_4$  (34.7 mg, 167.4  $\mu\text{mol}$ , 2.0 equiv.) in toluene (10ml) and  $\text{H}_2\text{O}$  (1 mL) was stirred for 12 h in the dark. The reaction mixture was filtered through celite and the volatiles were removed. Extraction was performed with DCM (3 x 25 mL), the combined organic layer was washed with  $\text{H}_2\text{O}$  (1 x 25 mL), dried over  $\text{MgSO}_4$  and filtered. The solvent was removed by rotary evaporator to give complex **15** as a white solid. Recrystallization of complex **15** was achieved from a mixture of DCM/*n*-hexane to afford (S)-15 in 75% isolated yield.  $[\alpha]_{\text{D}} = +223.0$  ( $c$  0.85, DCM).  $^{31}\text{P}\{^1\text{H}\}$  NMR

(CDCl<sub>3</sub>, 162 MHz):  $\delta$  63.6; <sup>1</sup>H NMR (CDCl<sub>3</sub>, 400 MHz):  $\delta$  7.89-7.83 (m, 3H, Ar), 7.76-7.71 (m, 3H, Ar), 7.58-7.32 (m, 10H, Ar), 5.54 (dd, 1H, *J* = 13.4, 9.8 Hz, PCH), 4.34 (dd, 1H, *J* = 18.0, 9.7 Hz, CH(CO<sub>2</sub>CH<sub>3</sub>)<sub>2</sub>), 3.82 (brs, 4H, OH<sub>2</sub>), 3.27 (s, 3H, CO<sub>2</sub>CH<sub>3</sub>), 2.98 (s, 3H, CO<sub>2</sub>CH<sub>3</sub>); <sup>13</sup>C NMR (CDCl<sub>3</sub>, 100 MHz):  $\delta$  167.2 (s, 2C, CO<sub>2</sub>CH<sub>3</sub>), 135.5-124.6 (22C, Ar), 56.0 (d, 1C, *J* = 7.2 Hz, CH(CO<sub>2</sub>CH<sub>3</sub>)<sub>2</sub>), 54.0 (s, 1C, CO<sub>2</sub>CH<sub>3</sub>), 52.9 (s, 1C, CO<sub>2</sub>CH<sub>3</sub>), 47.6 (d, 1C, *J* = 39.2 Hz, PCH). HRMS (+ESI) *m/z*: (M + H)<sup>+</sup> calcd for C<sub>28</sub>H<sub>29</sub>ClO<sub>10</sub>PPd, 697.0222; found, 697.0231.

### General procedure for asymmetric hydrophosphination of substrates **16** and **18**

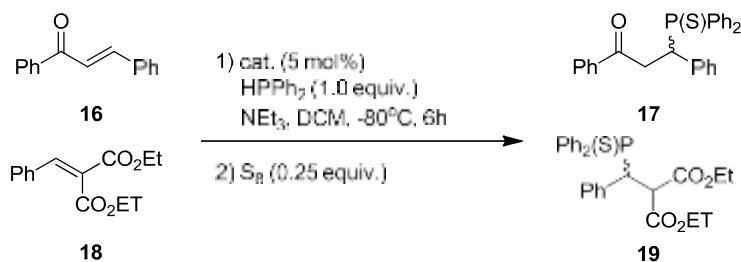

**Scheme s7.** Catalytic asymmetric hydrophosphination of substrates **16** and **18**.

The catalyst (5.37  $\mu\text{mol}$ , 5 mol %), substrate **16** or **18** (0.118 mmol, 1.1 equiv.) and NEt<sub>3</sub> (14.9  $\mu\text{L}$ , 0.107 mmol, 1.0 equiv.) was added to a solution of Ph<sub>2</sub>PH (20.0 mg, 0.107 mmol, 1.0 equiv) in DCM (6 mL) and stirred at -80°C. The completion of reaction was determined by the disappearance of the signal belonging to HPPPh<sub>2</sub> (-40.0 ppm) on <sup>31</sup>P{<sup>1</sup>H} NMR spectroscopy. The crude reaction mixture was treated with S<sub>8</sub> (6.92 mg, 0.027 mmol, 0.25 equiv.) for 10 min to form the respective products. The volatiles were removed under reduced pressure and the crude product was directly loaded onto silica gel column (1 EA : 15 *n*-hexane) to afford the product **17** as a white solid in quantitative yields. The spectroscopic data obtained for product **17** is consistent with literature.<sup>5</sup> The *ee* was determined on a Daicel Chiralpak IC column with *n*-hexane/2-propanol = 98/2, flow = 0.3 mL/min, wavelength = 270 nm. Retention times: 40.8 min ((*S*)-**17**), 56.3 min ((*R*)-**17**). The product **19** was purified by silica gel column (1 EA : 30 *n*-hexane) and obtained as a white solid in quantitative yields. [ $\alpha$ ]<sub>D</sub> = -62.0 (*c* 0.27, DCM). Mp: 107-108°C. <sup>31</sup>P{<sup>1</sup>H} NMR (CDCl<sub>3</sub>, 162 MHz):  $\delta$  50.6; <sup>1</sup>H NMR (CDCl<sub>3</sub>, 400 MHz):  $\delta$  8.23-8.20 (m, 2H, Ar), 7.60-7.50 (m, 5H, Ar), 7.27-7.03 (m, 8H, Ar), 4.86-4.80 (m, 2H, CO<sub>2</sub>CH<sub>2</sub>), 3.82-3.74 (m, 2H, CO<sub>2</sub>CH<sub>2</sub>), 3.66-3.57 (m, 1H, PCH), 3.47-3.41 (m, 1H, CH(CO<sub>2</sub>CH<sub>2</sub>CH<sub>3</sub>)<sub>2</sub>), 1.01 (t, 3H, *J* = 7.1 Hz, CH<sub>2</sub>CH<sub>3</sub>), 0.82 (t, 3H, *J* = 7.1 Hz, CH<sub>2</sub>CH<sub>3</sub>) <sup>13</sup>C NMR (CDCl<sub>3</sub>, 100 MHz):  $\delta$  166.9 (s, 1C, O=COEt), 166.7(s, 1C, O=COEt), 133.5-127.3 (m, 15C, Ar), 61.4 (d, 2C, *J* = 14.3 Hz, CH<sub>2</sub>), 53.8 (d, 1C, *J* = 4.3 Hz, CHPh<sub>2</sub>), 45.8 (d, 1C, *J* = 49.3 Hz, CHCOO), 13.3 (d, 2C, *J* = 11.9 Hz, CH<sub>3</sub>). The *ee* was determined on a Daicel Chiralpak IC column with *n*-hexane/2-propanol = 98/2, flow = 1.0 mL/min, wavelength = 250 nm. Retention times: 31.4 min, 36.8 min.

## Synthesis of gold(I)-phosphine complex (S)-20.

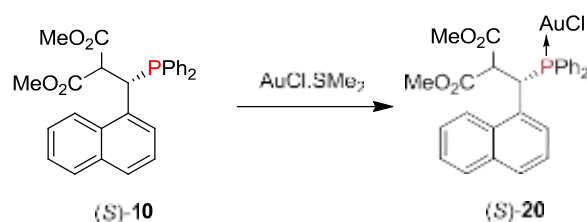

**Scheme s8.** Synthesis of gold(I)-phosphine complex (S)-20.

A mixture of chloro(dimethylsulfide)gold(I) chloride (29.5 mg, 0.10 mmol, 1.0 equiv.) and the phosphine ligand (S)-10 (43.8 mg, 0.10 mmol, 1.0 equiv.) in DCM (20 mL) was stirred at RT for 30 min in the dark. The crude product (S)-20 was purified by silica gel column chromatography (1 EA : 4 *n*-hexane) to afford complex (S)-20 as a white solid in 99% isolated yield. Complex (S)-20 was recrystallized from a mixture of DCM/*n*-hexane.  $[\alpha]_D = -33.6$  (*c* 0.76, DCM). Mp: 177-178°C.  $^{31}\text{P}\{^1\text{H}\}$  NMR (CDCl<sub>3</sub>, 162 MHz):  $\delta$  46.9;  $^1\text{H}$  NMR (CDCl<sub>3</sub>, 400 MHz):  $\delta$  8.11 (ddd, 2H, *J* = 12.8, 7.1, 2.2 Hz, Ar), 7.96 (dd, 2H, *J* = 11.9, 7.9 Hz, Ar), 7.66-7.58 (m, 5H, Ar), 7.42 (d, 1H, *J* = 7.7 Hz, Ar), 7.34-7.29 (m, 2H, Ar), 7.04 (dd, 2H, *J* = 12.8, 7.4 Hz, Ar), 6.92 (dd, 1H, *J* = 8.0, 6.3 Hz, Ar), 6.77 (td, 2H, *J* = 7.8, 2.6 Hz, Ar), 5.70-5.64 (m, 1H, PCH), 4.67 (t, 1H, *J* = 11.0 Hz, CH(CO<sub>2</sub>CH<sub>3</sub>)<sub>2</sub>), 3.26 (s, 3H, CO<sub>2</sub>CH<sub>3</sub>), 3.14 (s, 3H, CO<sub>2</sub>CH<sub>3</sub>);  $^{13}\text{C}$  NMR (CDCl<sub>3</sub>, 100 MHz):  $\delta$  167.2 (s, 1C, CO<sub>2</sub>), 166.3 (d, 1C, *J* = 17.9 Hz, CO<sub>2</sub>), 134.9-122.5 (22C, Ar), 56.5 (d, 1C, *J* = 13.3 Hz, CH(CO<sub>2</sub>CH<sub>3</sub>)<sub>2</sub>), 52.6 (d, 2C, *J* = 8.2 Hz, CO<sub>2</sub>CH<sub>3</sub>), 36.8 (d, 1C, *J* = 34.7 Hz, PCH).

## Reference

- (1) Y. Huang, R. J. Chew, Y. Li, S. A. Pullarkat and P.-H. Leung, *Org. Lett.* 2011, **13**, 5862-5865.
- (2) Y. Huang, S. A. Pullarkat, Y. Li and P.-H. Leung, *Inorg. Chem.* 2012, **51**, 2533-2540.
- (3) A. C. Cope and E. C. Friedrich, *J. Am. Chem. Soc.* 1968, **90**, 909-913.
- (4) (a) E. J. Corey and M. Chaykovsky, *J. Am. Chem. Soc.* 1965, **87**, 1353-1364; (b) P. D. Pohlhaus, S. D. Sanders, A. T. Parsons, W. Li and J. S. Johnson, *J. Am. Chem. Soc.* 2008, **130**, 8642-8650; (c) M. Skvorcova, L. Grigorjeva and A. Jirgensons, *Org. Lett.* 2015, **17**, 2902-2904.
- (5) F. Alonso and Y. Moglie, *Curr. Green Chem.* 2014, **1**, 87-93.

## NMR Spectra

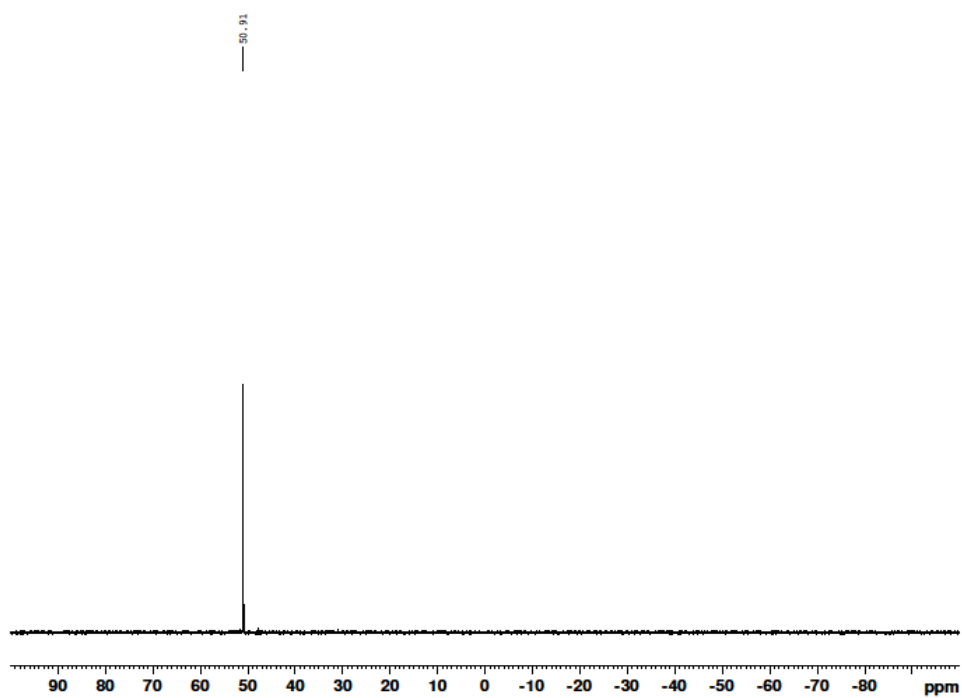

Figure s2.  $^{31}\text{P}\{^1\text{H}\}$  NMR spectrum of phosphine sulfide **10'**.

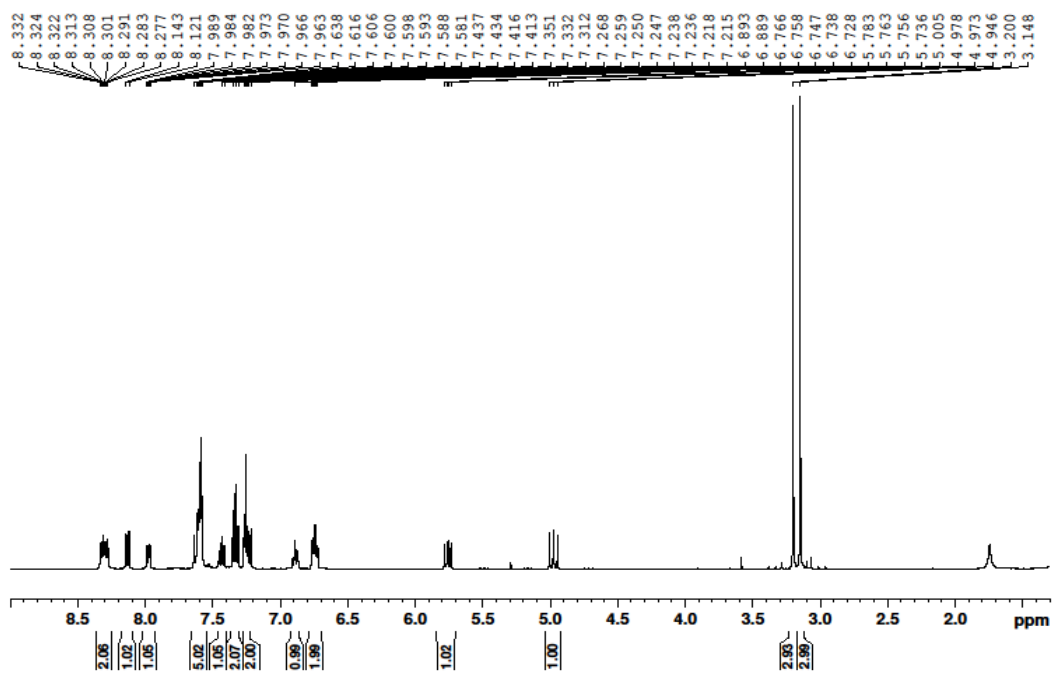

Figure s3.  $^1\text{H}$  NMR spectrum of phosphine sulfide **10'**.



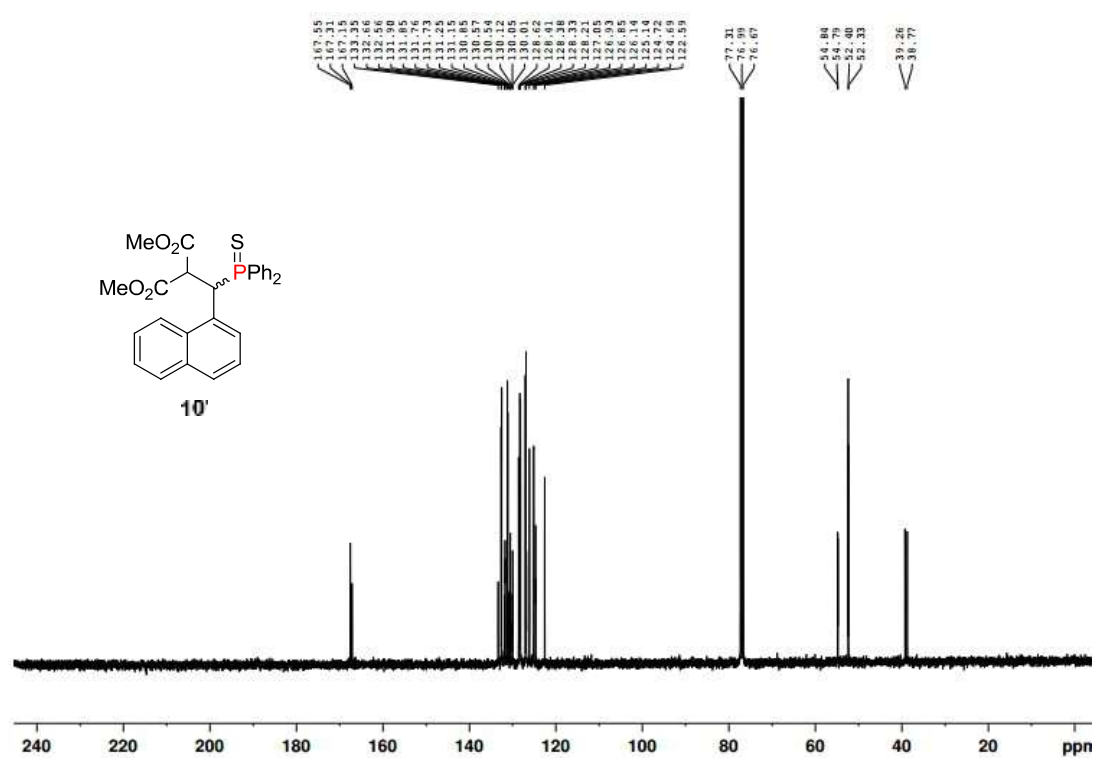

Figure s4.  $^{13}\text{C}$  NMR spectrum of phosphine sulfide **10'**.

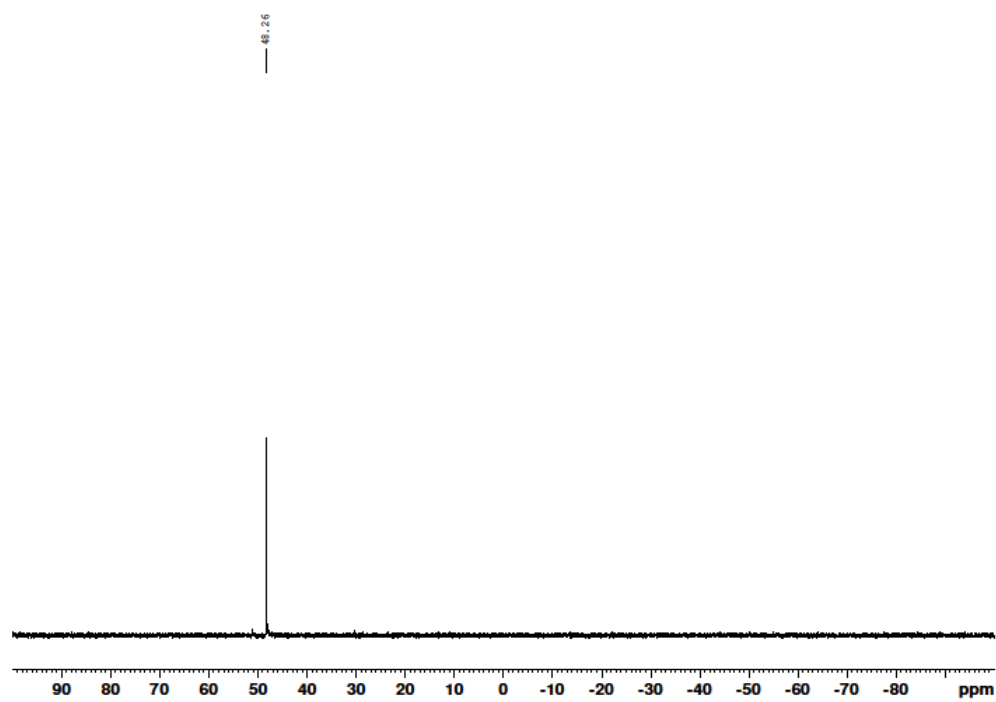

Figure s5.  $^{31}\text{P}\{^1\text{H}\}$  NMR spectrum of coordination complex (*S*)-**12a**.

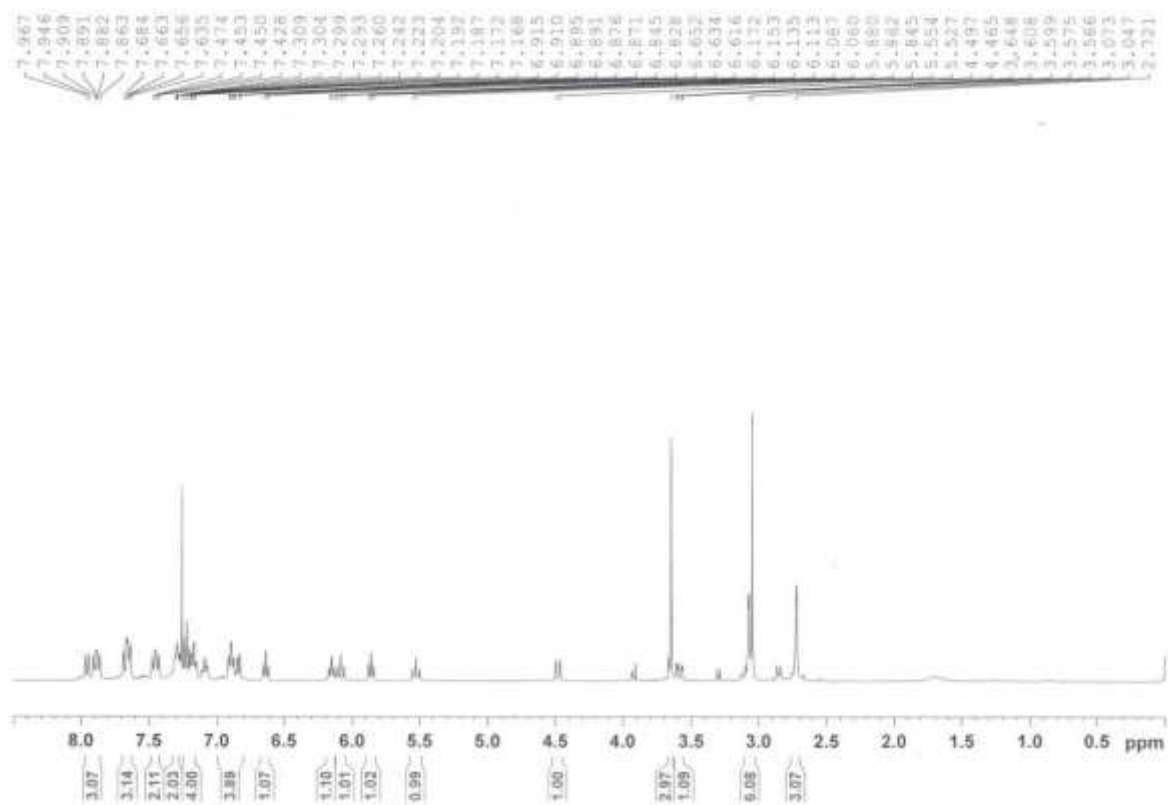

Figure s6.  $^1\text{H}$  NMR spectrum of coordination complex (*S*)-12a.

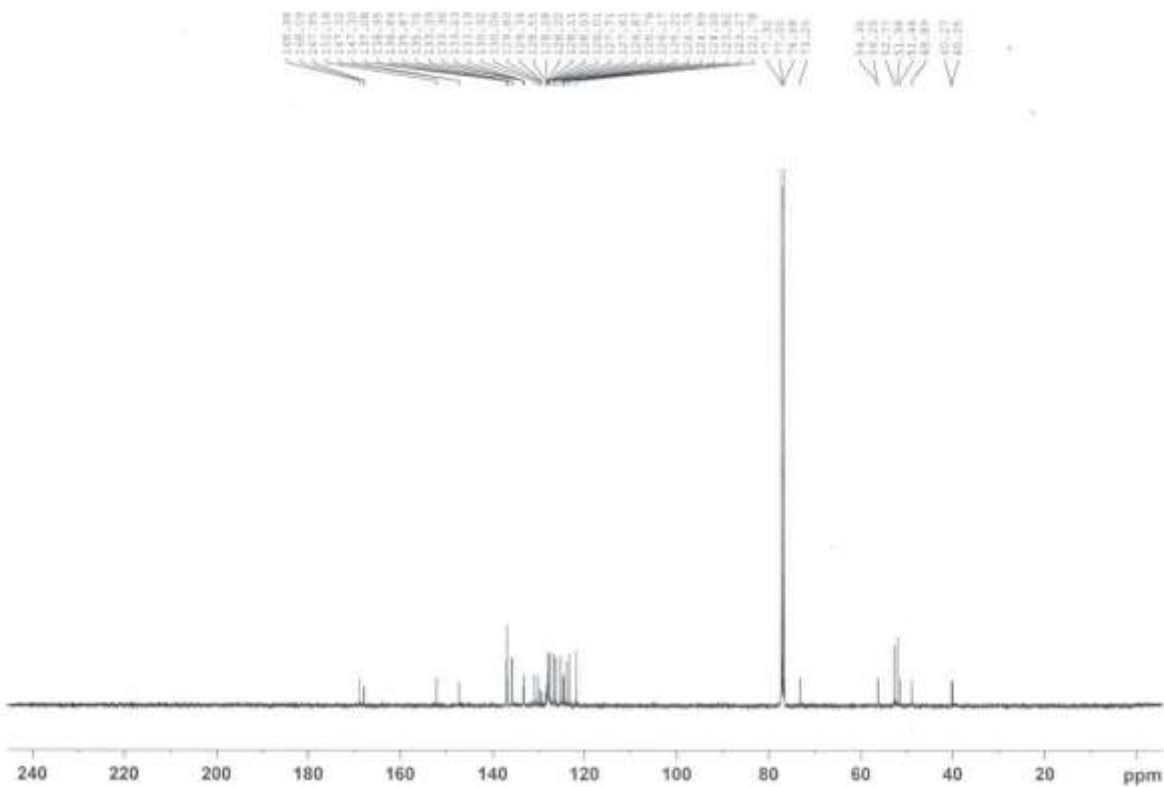

Figure s7.  $^{13}\text{C}$  NMR spectrum of coordination complex (*S*)-12a.

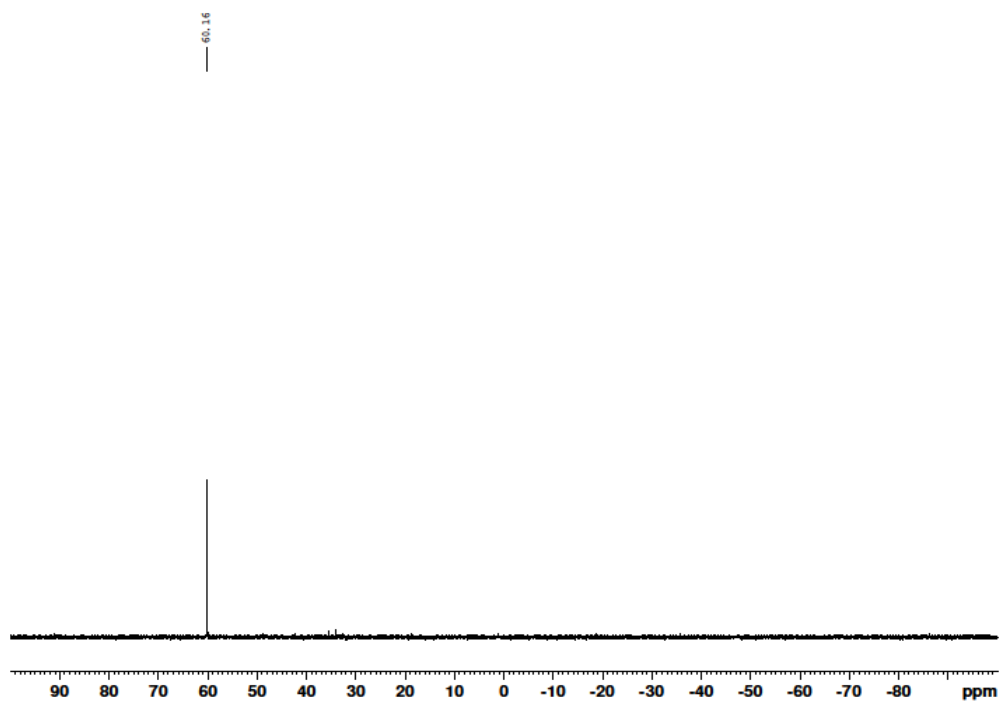

Figure s8.  $^{31}\text{P}\{^1\text{H}\}$  NMR spectrum of P-O bidentate complex (S)-12b.

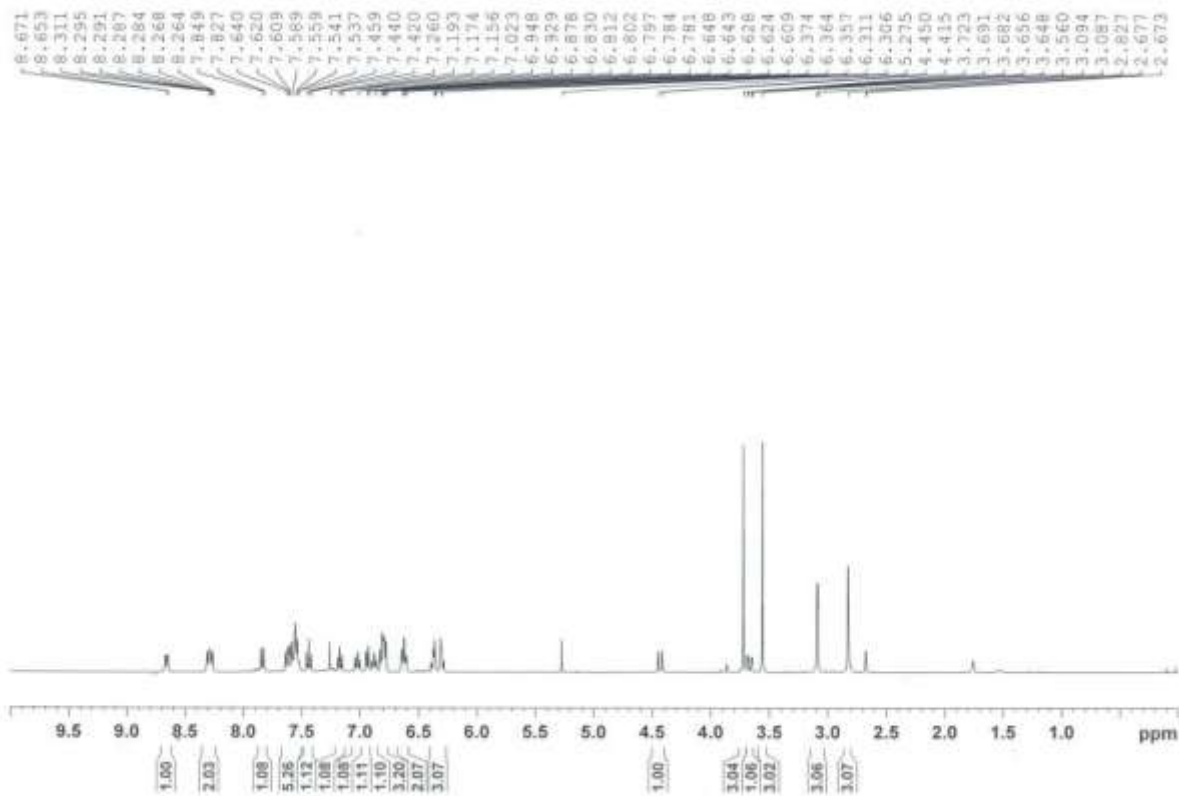

Figure s9.  $^1\text{H}$  NMR spectrum of P-O bidentate complex (S)-12b.



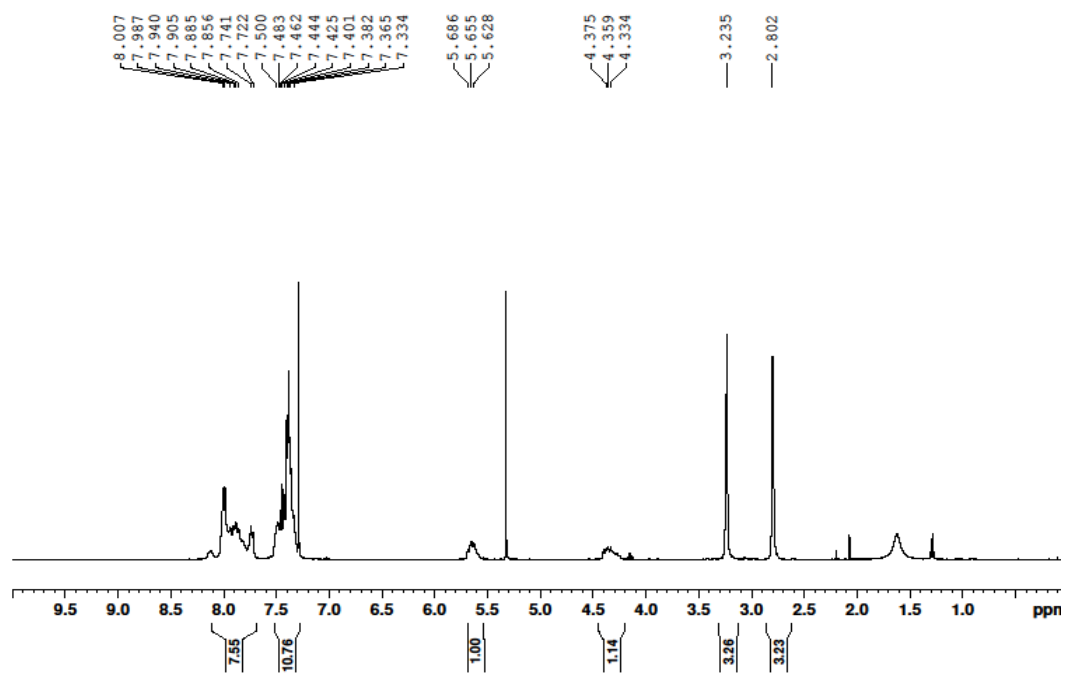

Figure s12.  $^1\text{H}$  NMR spectrum of dimeric complex (*S*)-13.

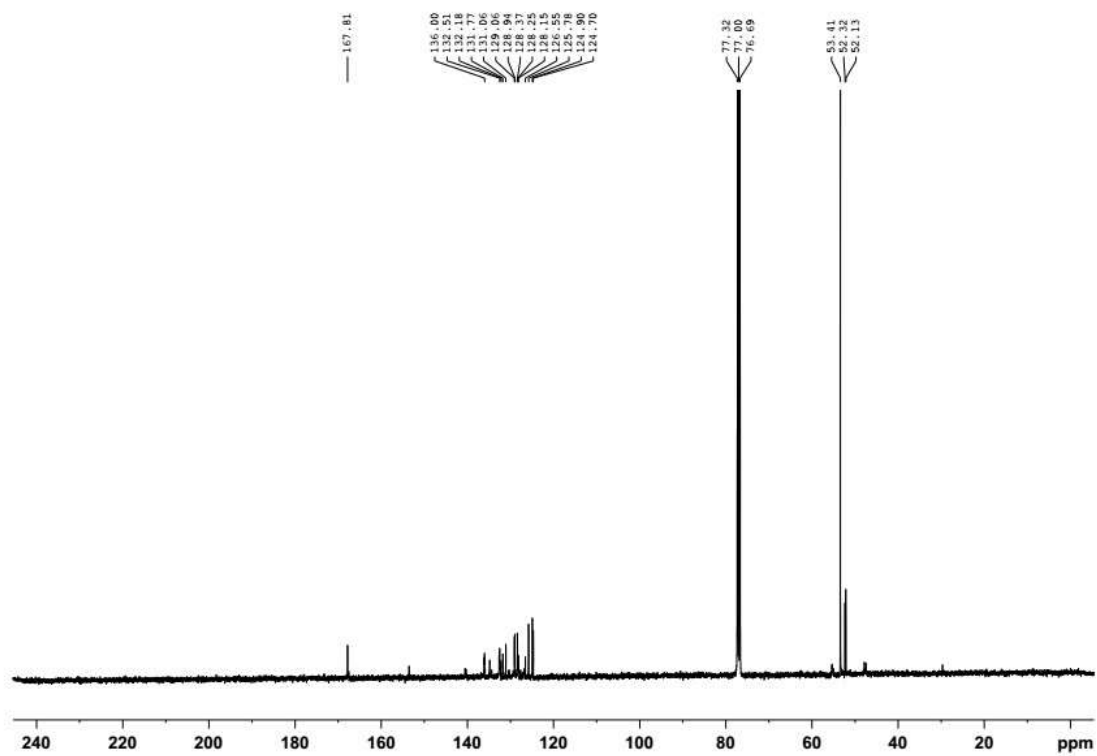

Figure s13.  $^{13}\text{C}$  NMR spectrum of dimeric complex (*S*)-13.

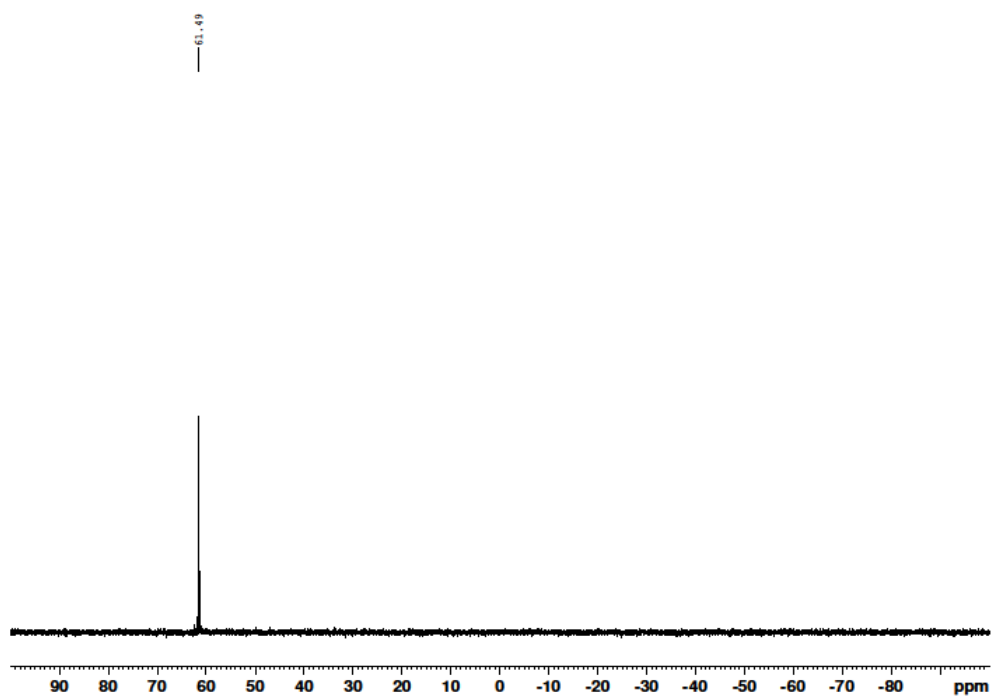

Figure s14.  $^{31}\text{P}\{^1\text{H}\}$  NMR spectrum of monomeric bisacetonitrile complex (S)-14.

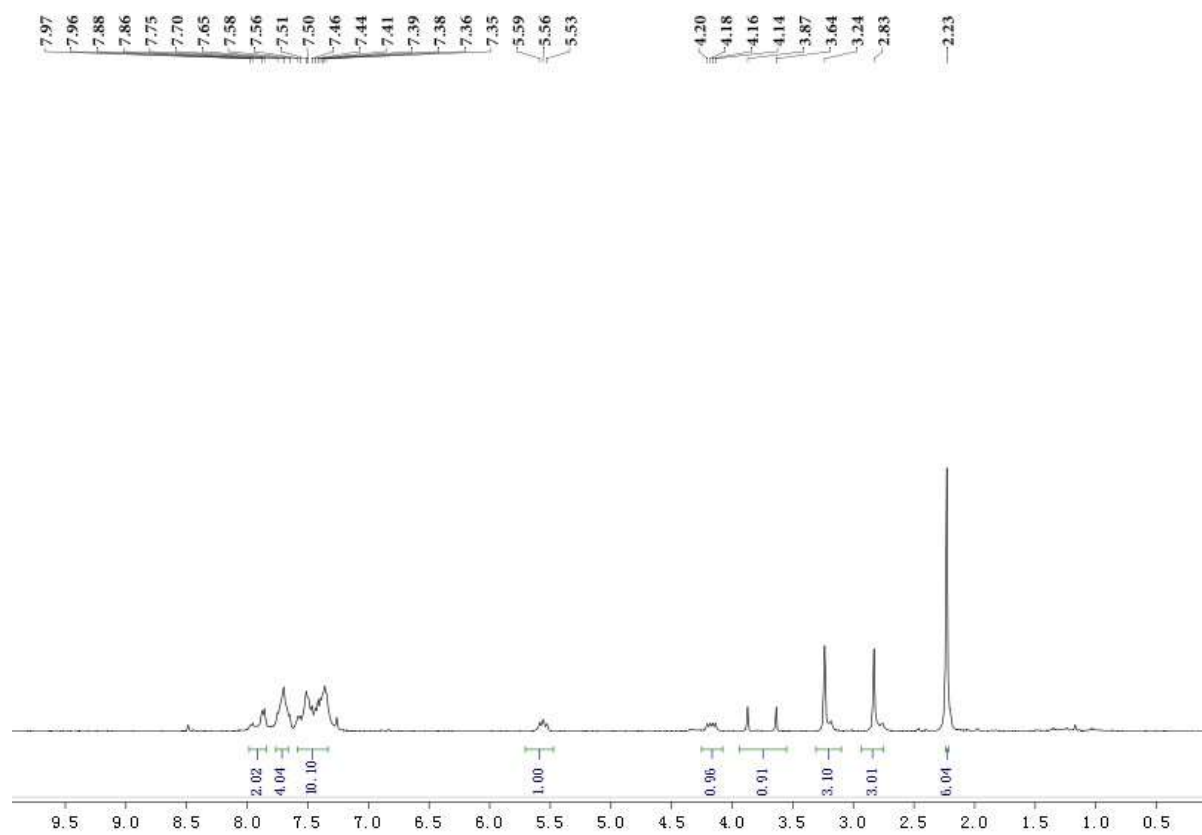

Figure s15.  $^1\text{H}$  NMR spectrum of monomeric bisacetonitrile complex (S)-14.

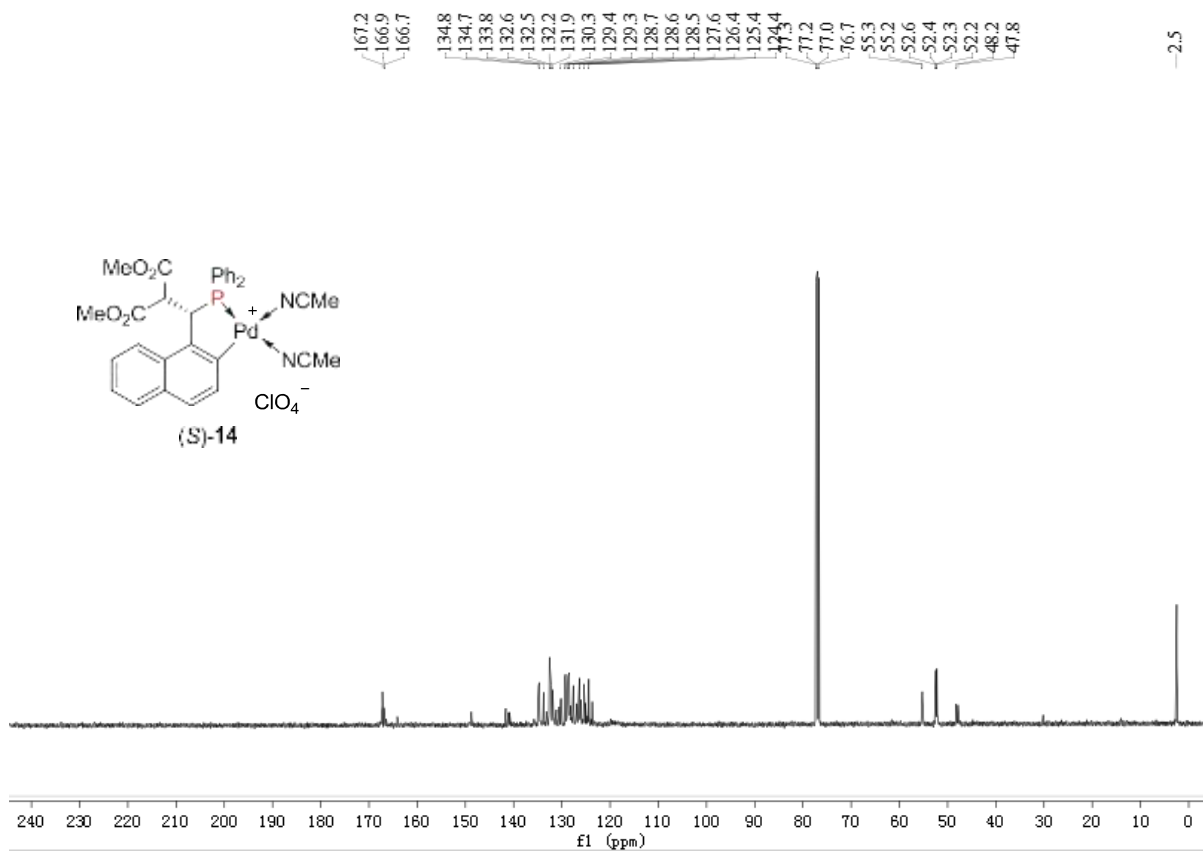

Figure s16.  $^{13}\text{C}$  NMR spectrum of monomeric bisacetonitrile complex (S)-14.

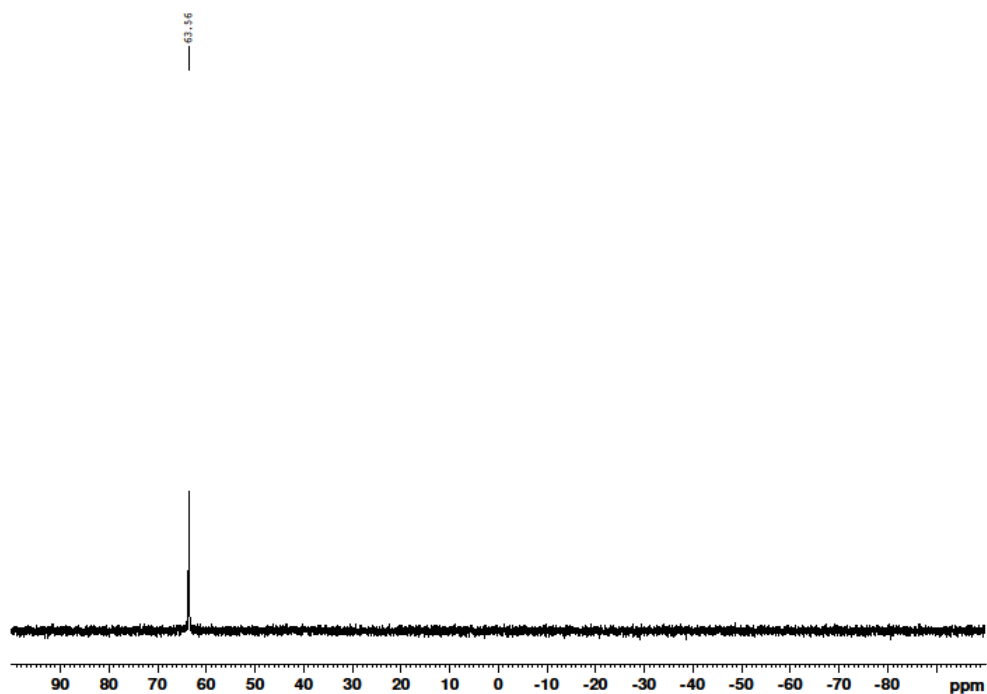

Figure s17.  $^{31}\text{P}\{^1\text{H}\}$  NMR spectrum of monomeric bisacetonitrile complex (S)-15.

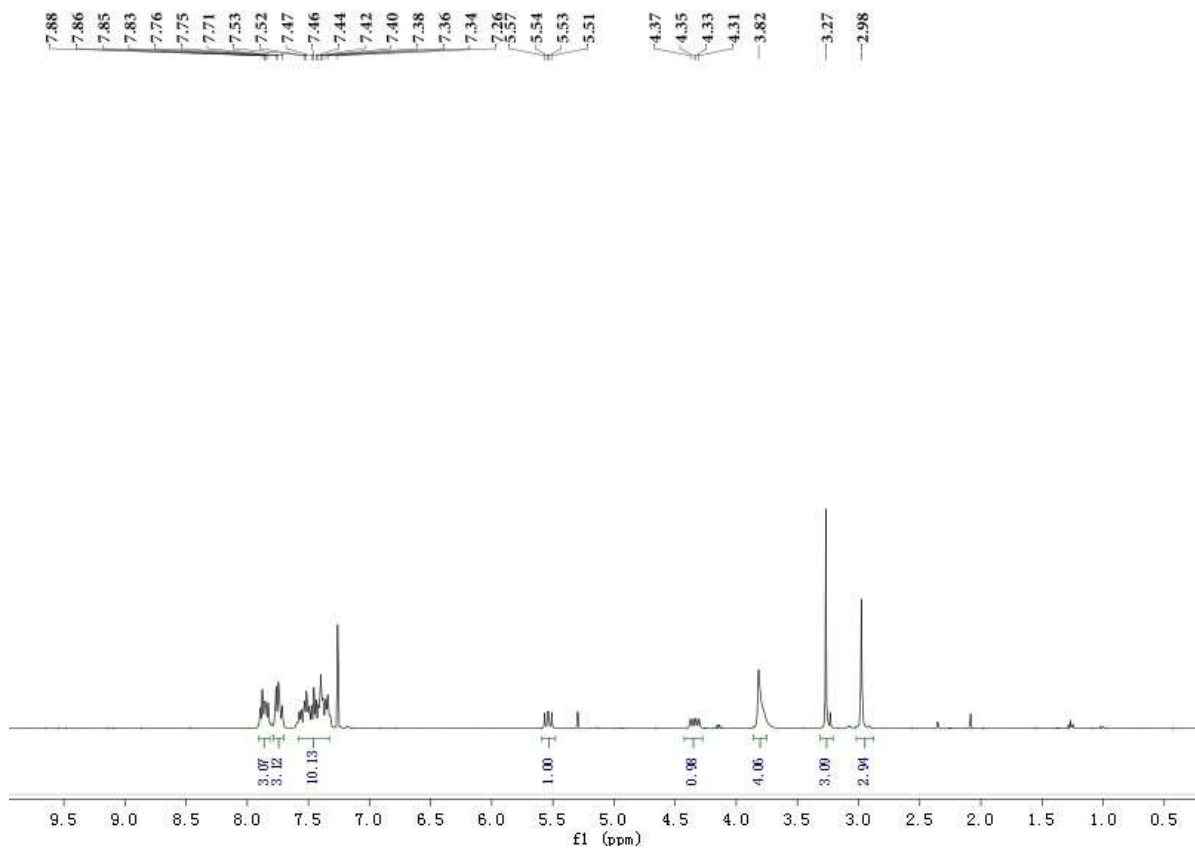

**Figure s18.**  $^1\text{H}$  NMR spectrum of monomeric bisaquo complex (*S*)-15.

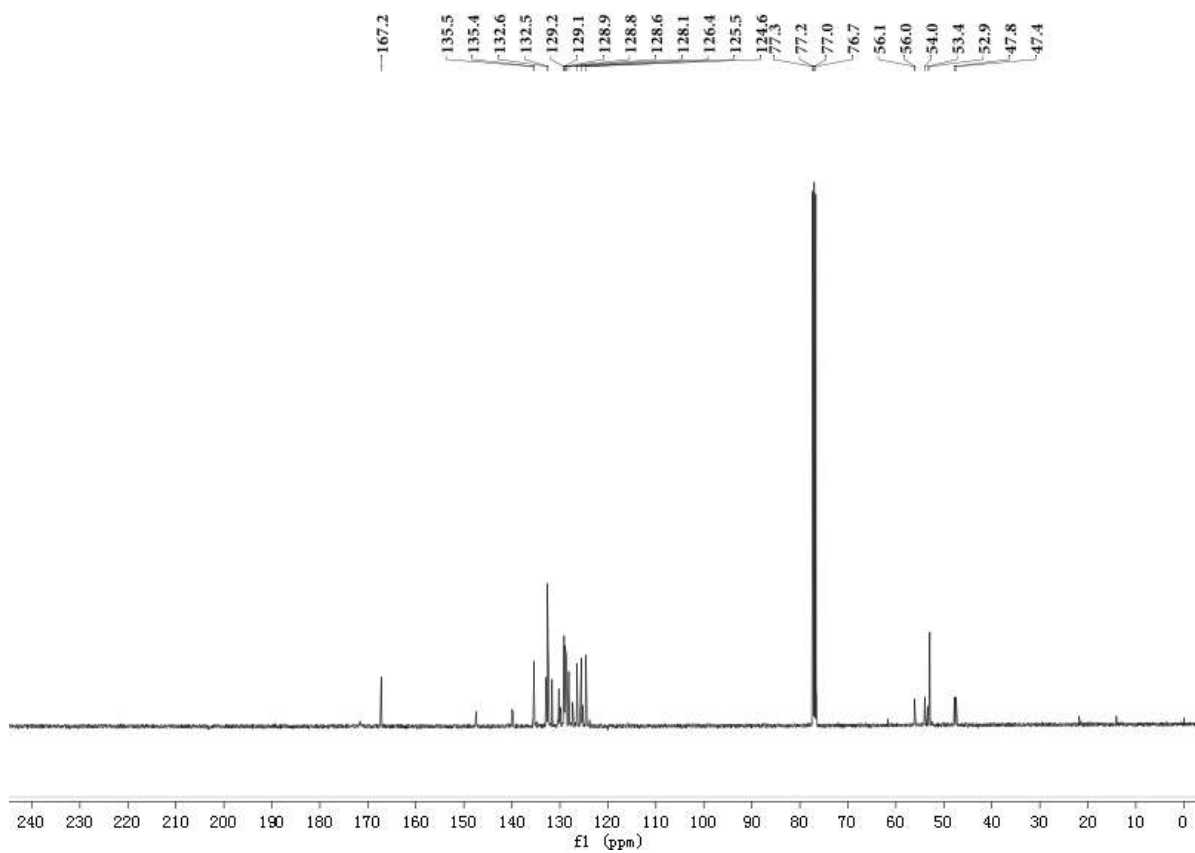

**Figure s19.**  $^{13}\text{C}$  NMR spectrum of monomeric bisaquo complex (*S*)-15.



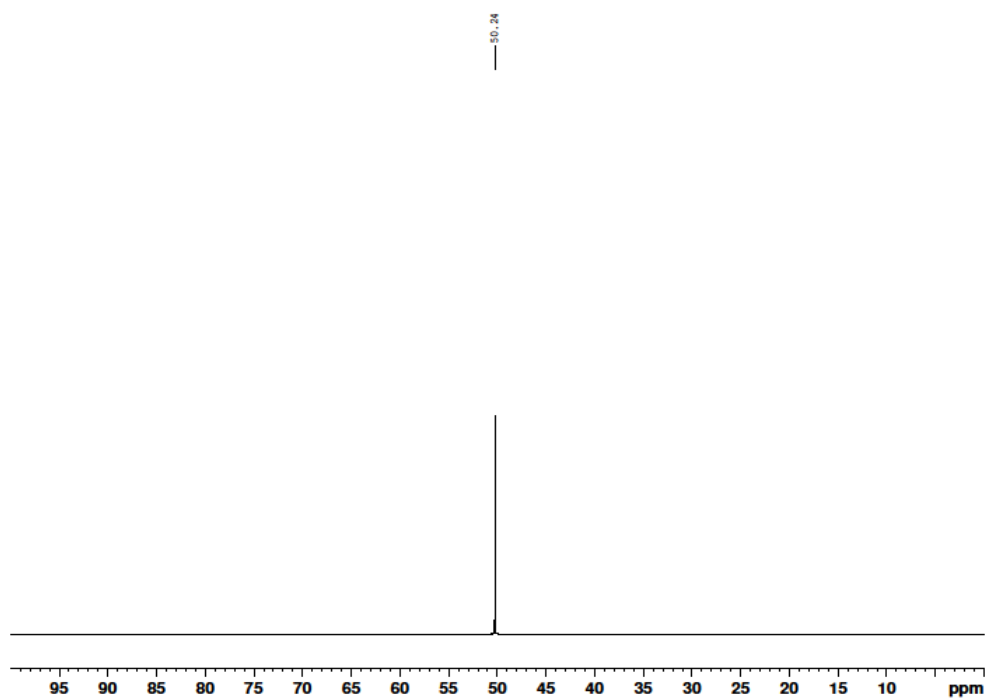

Figure s20.  $^{31}\text{P}\{^1\text{H}\}$  NMR spectrum of phosphine sulfide **19**.

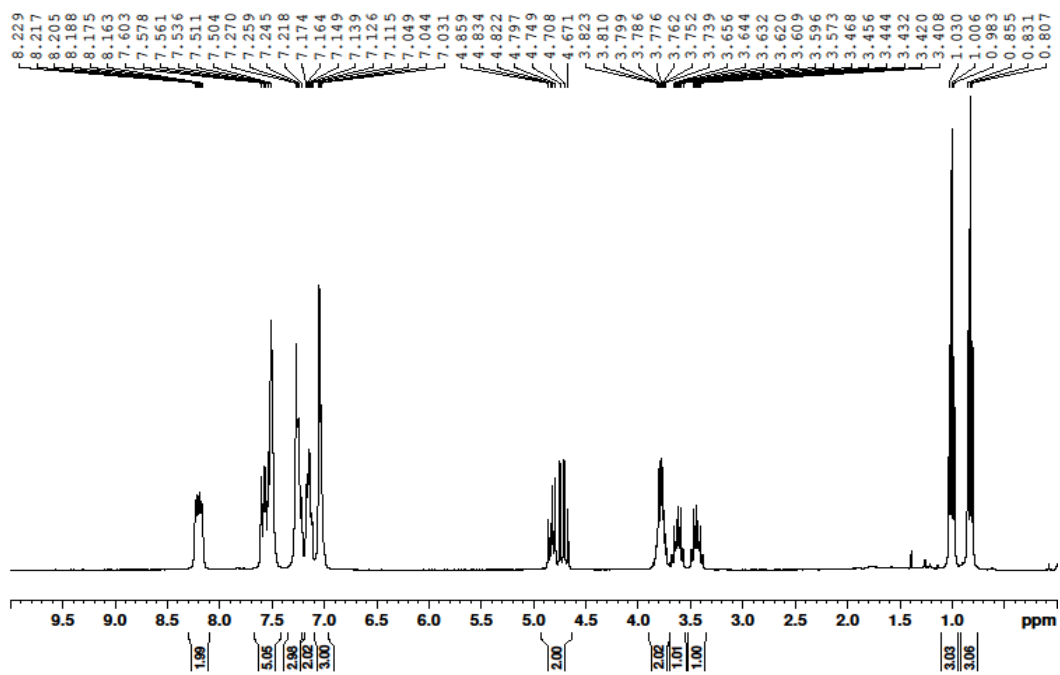

Figure s21.  $^1\text{H}$  NMR spectrum of phosphine sulfide **19**.

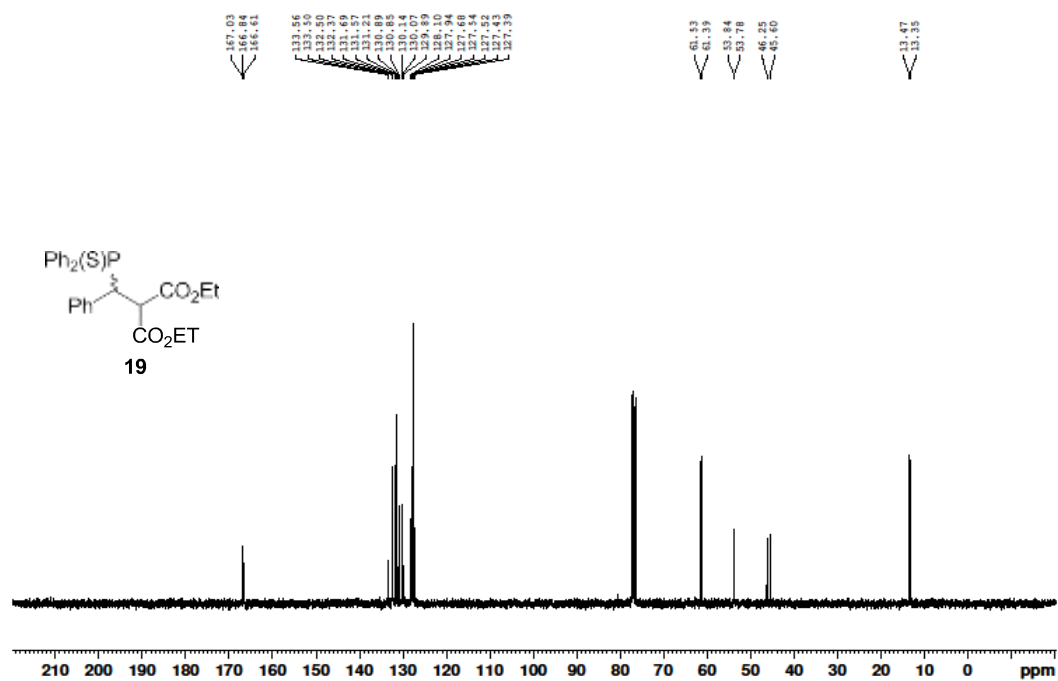

Figure s22.  $^{13}\text{C}$  NMR spectrum of phosphine sulfide **19**.

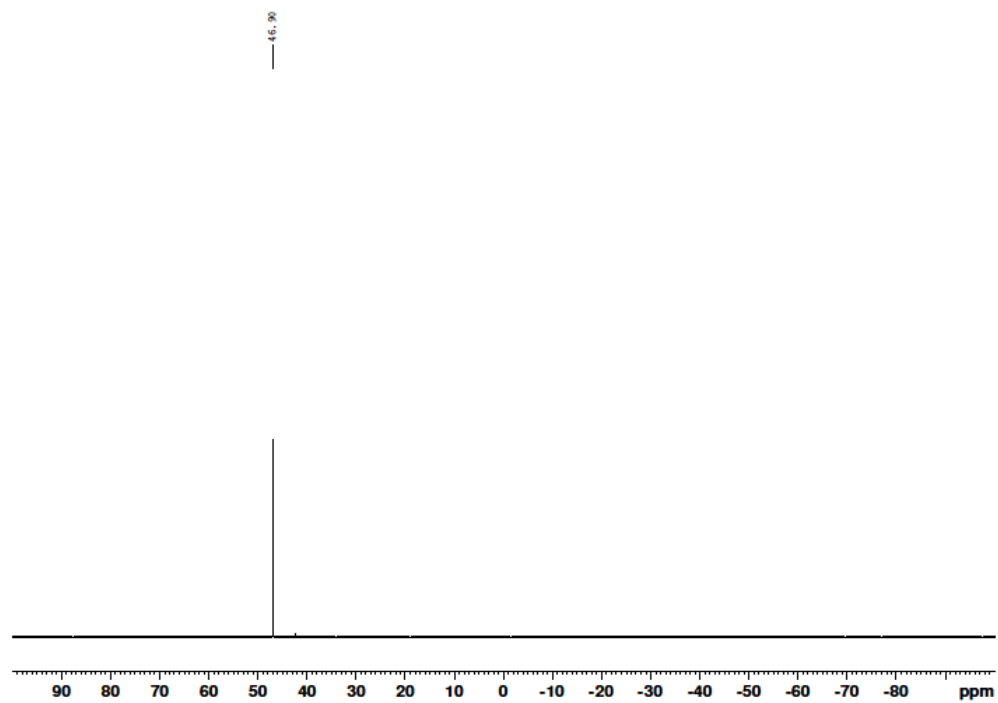

Figure s23.  $^{31}\text{P}\{^1\text{H}\}$  NMR spectrum of phosphine gold(I) complex (*S*)-**20**.

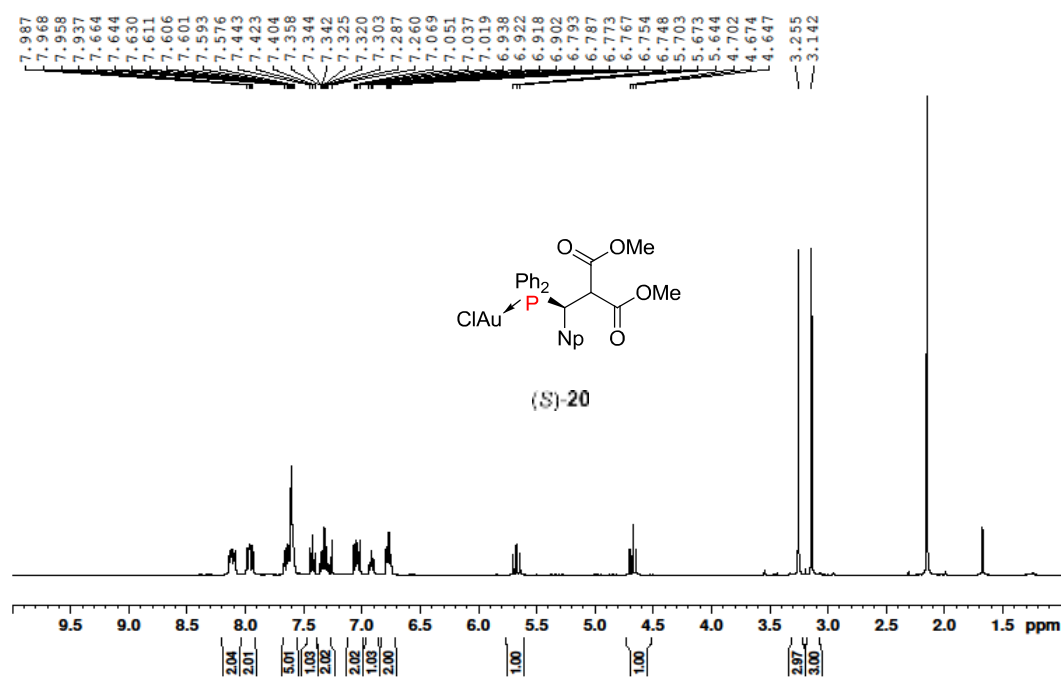

Figure s24. <sup>1</sup>H NMR spectrum of phosphine gold(I) complex (*S*)-20.

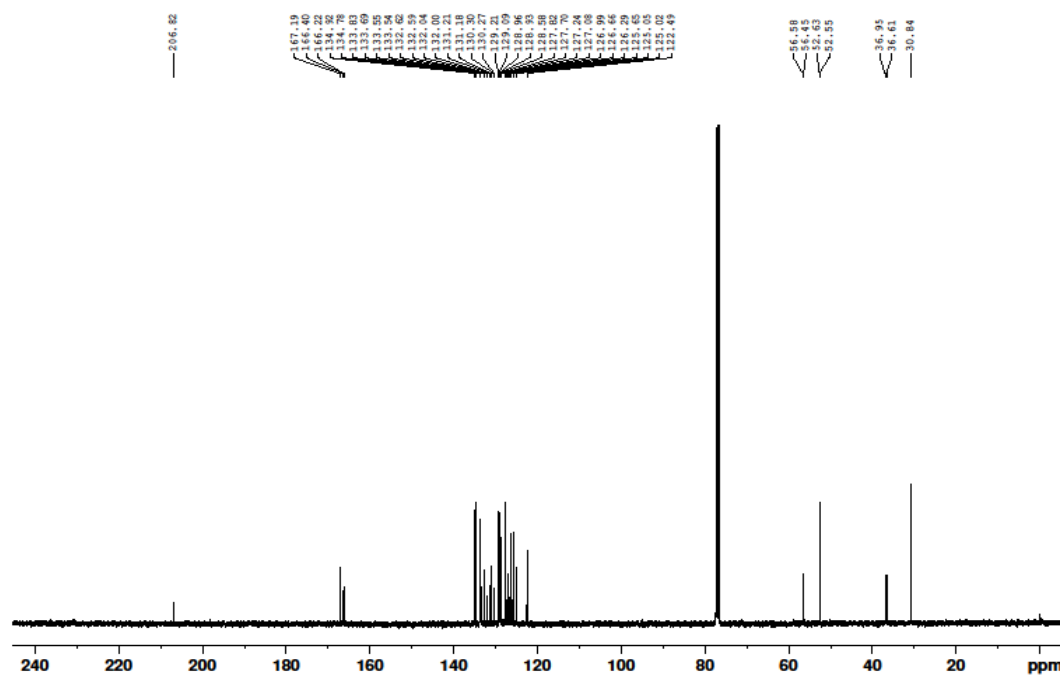

Figure s25. <sup>13</sup>C NMR spectrum of phosphine gold(I) complex (*S*)-20.

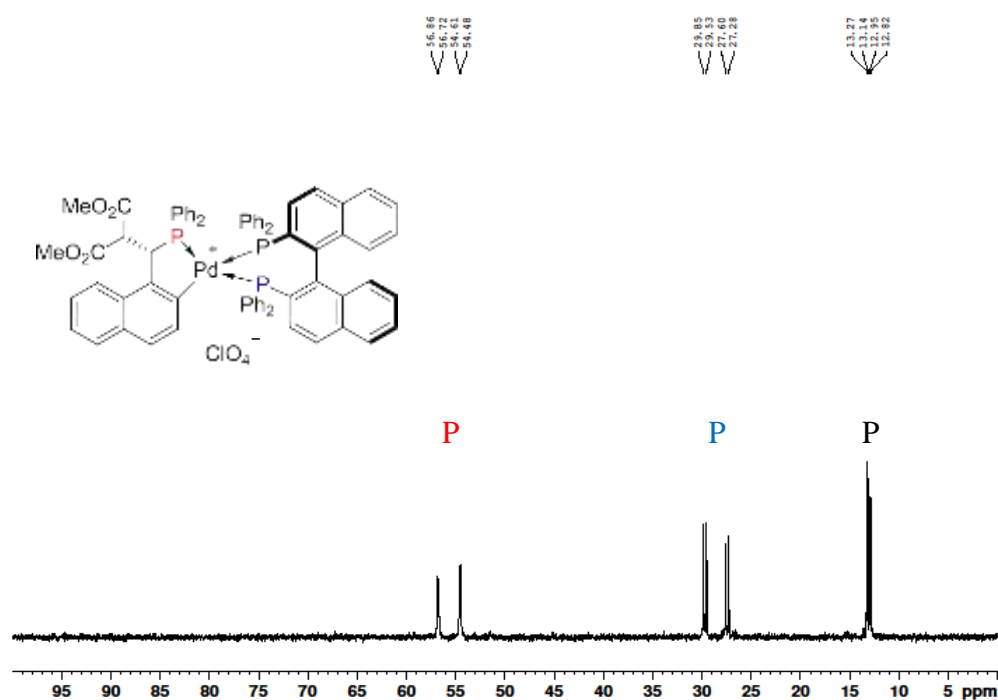

**Figure s26.** <sup>31</sup>P{<sup>1</sup>H} NMR spectrum of product from coordination of (*S*)-BINAP to complex (*S*)-**14**.

From the coordination experiment conducted between complex (*S*)-**14** and (*S*)-BINAP, the *ee* of the PC-palladacycle complex was determined to be >99% after a single recrystallization. With reference to the <sup>31</sup>P{<sup>1</sup>H} NMR spectrum obtained above, the three phosphorus atoms located on the coordination complex may be identified by their coupling constants and chemical shifts. If both enantiomers of the PC-palladacycle complex were present, two sets of similar signals (with different intensities based on the enantiomeric ratio of the isomers) should be obtained. Since that is not observed, it is clear that only one enantiomer of the complex is present after a single recrystallization.

## HPLC Spectra

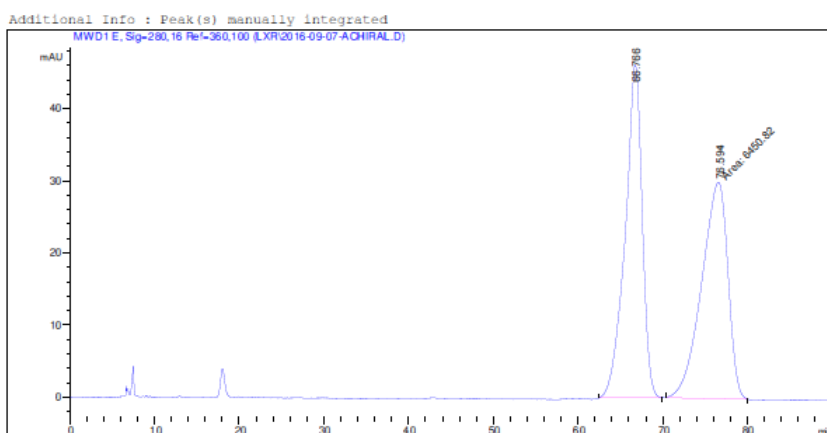

-----  
Area Percent Report  
-----

Sorted By : Signal  
Multiplier: : 1.0000  
Dilution: : 1.0000  
Sample Amount: : 1.00000 [ng/ul] (not used in calc.)  
Use Multiplier & Dilution Factor with ISTDs

Signal 1: MWD1 E, Sig=280,16 Ref=360,100

| Peak # | RetTime [min] | Type | Width [min] | Area [mAU*s] | Height [mAU] | Area %  |
|--------|---------------|------|-------------|--------------|--------------|---------|
| 1      | 66.766        | BB   | 1.8289      | 6461.04736   | 46.10719     | 50.0396 |
| 2      | 76.594        | MM   | 3.5812      | 6450.81738   | 30.02137     | 49.9604 |

Figure s27. HPLC spectrum for racemic phosphine sulfide 10'.

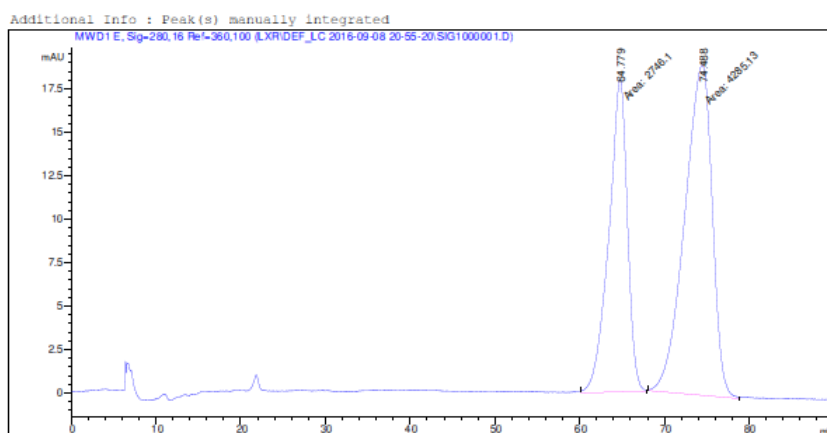

-----  
Area Percent Report  
-----

Sorted By : Signal  
Multiplier: : 1.0000  
Dilution: : 1.0000  
Use Multiplier & Dilution Factor with ISTDs

Signal 1: MWD1 E, Sig=280,16 Ref=360,100

| Peak # | RetTime [min] | Type | Width [min] | Area [mAU*s] | Height [mAU] | Area %  |
|--------|---------------|------|-------------|--------------|--------------|---------|
| 1      | 64.779        | MM   | 2.5462      | 2746.10034   | 17.97495     | 39.0558 |
| 2      | 74.488        | MM   | 3.7599      | 4285.13086   | 18.99499     | 60.9442 |

Figure s28. HPLC spectrum for phosphine sulfide 10' in Table 1 Entry 1.

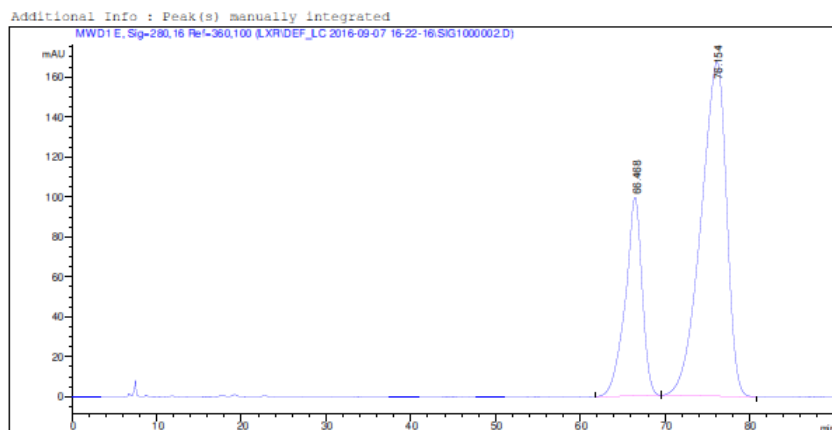

-----  
 Area Percent Report  
 -----

Sorted By : Signal  
 Multiplier: : 1.0000  
 Dilution: : 1.0000  
 Use Multiplier & Dilution Factor with ISTDs

Signal 1: MWD1 E, Sig-280,16 Ref-360,100

| Peak # | RetTime [min] | Type | Width [min] | Area [mAU*s] | Height [mAU] | Area %  |
|--------|---------------|------|-------------|--------------|--------------|---------|
| 1      | 66.468        | BB   | 1.8816      | 1.36759e4    | 99.36965     | 28.0082 |
| 2      | 76.154        | BB   | 2.5996      | 3.51524e4    | 167.28322    | 71.9918 |

Figure s29. HPLC spectrum for phosphine sulfide 10' in Table 1 Entry 2.

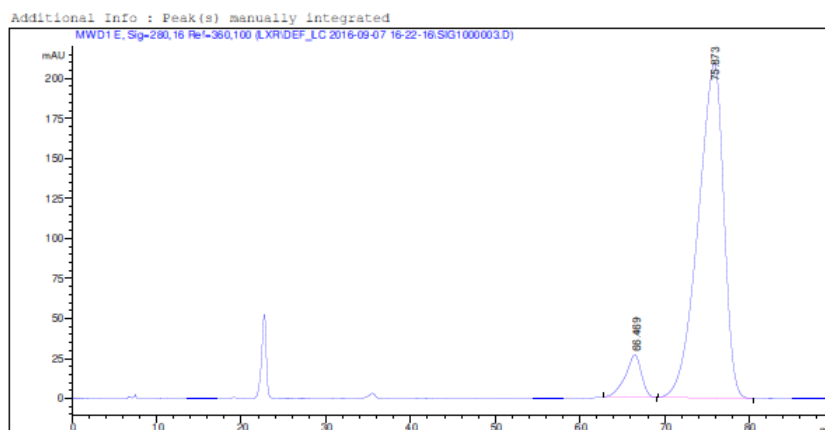

-----  
 Area Percent Report  
 -----

Sorted By : Signal  
 Multiplier: : 1.0000  
 Dilution: : 1.0000  
 Use Multiplier & Dilution Factor with ISTDs

Signal 1: MWD1 E, Sig-280,16 Ref-360,100

| Peak # | RetTime [min] | Type | Width [min] | Area [mAU*s] | Height [mAU] | Area %  |
|--------|---------------|------|-------------|--------------|--------------|---------|
| 1      | 66.469        | BB   | 1.5989      | 3500.08398   | 26.49988     | 7.3672  |
| 2      | 75.873        | BB   | 2.8049      | 4.40090e4    | 209.15257    | 92.6328 |

Figure s30. HPLC spectrum for phosphine sulfide 10' in Table 1 Entry 3.

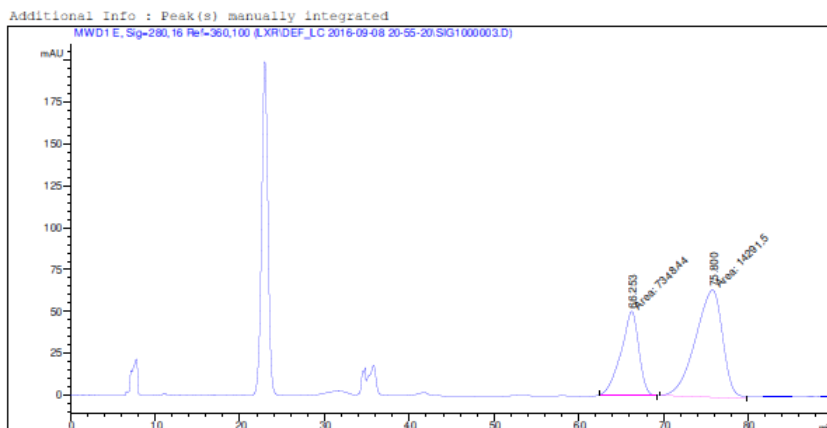

-----  
Area Percent Report  
-----

Sorted By : Signal  
Multiplier: : 1.0000  
Dilution: : 1.0000  
Use Multiplier & Dilution Factor with ISTDs

Signal 1: MWD1 E, Sig=280,16 Ref=360,100

| Peak # | RetTime [min] | Type | Width [min] | Area [mAU*s] | Height [mAU] | Area %  |
|--------|---------------|------|-------------|--------------|--------------|---------|
| 1      | 66.253        | MM   | 2.4440      | 7348.43799   | 50.11135     | 33.9577 |
| 2      | 75.800        | MM   | 3.7153      | 1.42915e4    | 64.11132     | 66.0423 |

Figure s31. HPLC spectrum for phosphine sulfide 10' in Table 1 Entry 4.

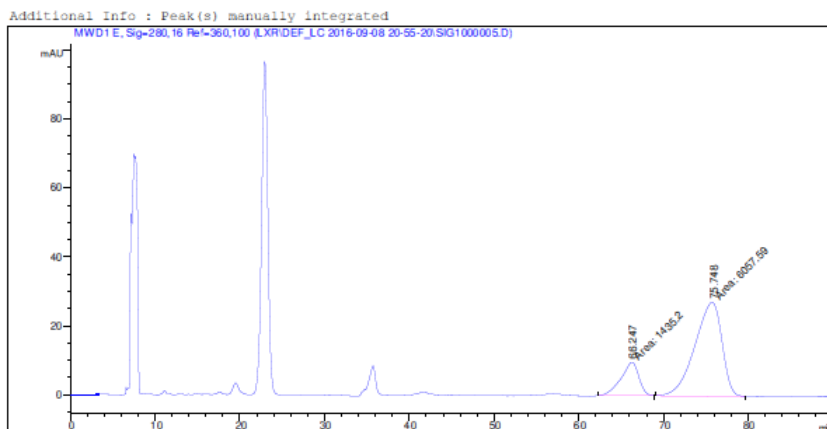

-----  
Area Percent Report  
-----

Sorted By : Signal  
Multiplier: : 1.0000  
Dilution: : 1.0000  
Use Multiplier & Dilution Factor with ISTDs

Signal 1: MWD1 E, Sig=280,16 Ref=360,100

| Peak # | RetTime [min] | Type | Width [min] | Area [mAU*s] | Height [mAU] | Area %  |
|--------|---------------|------|-------------|--------------|--------------|---------|
| 1      | 66.247        | MM   | 2.4635      | 1435.19775   | 9.70981      | 19.1544 |
| 2      | 75.748        | MM   | 3.7015      | 6057.59180   | 27.27573     | 80.8456 |

Figure s32. HPLC spectrum for phosphine sulfide 10' in Table 1 Entry 5.

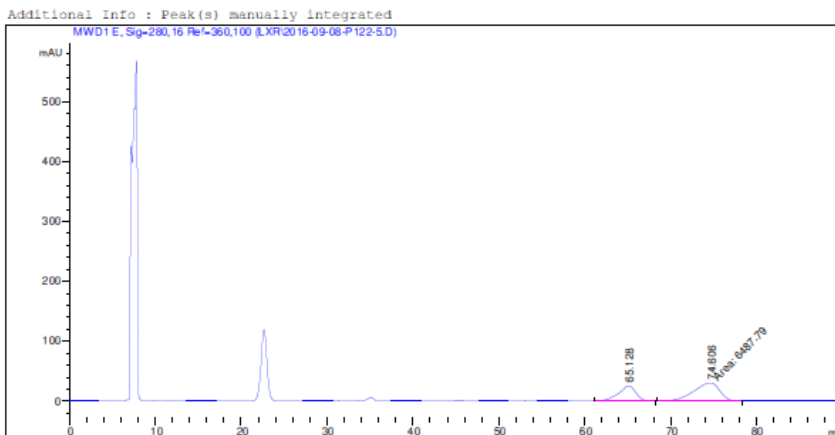

-----  
 Area Percent Report  
 -----

Sorted By : Signal  
 Multiplier: : 1.0000  
 Dilution: : 1.0000  
 Sample Amount: : 1.00000 [ng/ul] (not used in calc.)  
 Use Multiplier & Dilution Factor with ISTDs

Signal 1: MWD1 E, Sig=280,16 Ref=360,100

| Peak # | RetTime [min] | Type | Width [min] | Area [mAU*s] | Height [mAU] | Area %  |
|--------|---------------|------|-------------|--------------|--------------|---------|
| 1      | 65.128        | BB   | 1.6925      | 3535.75317   | 25.39251     | 35.2745 |
| 2      | 74.606        | MM   | 3.5523      | 6487.79199   | 30.43944     | 64.7255 |

Figure s33. HPLC spectrum for phosphine sulfide 10' in Table 1 Entry 6.

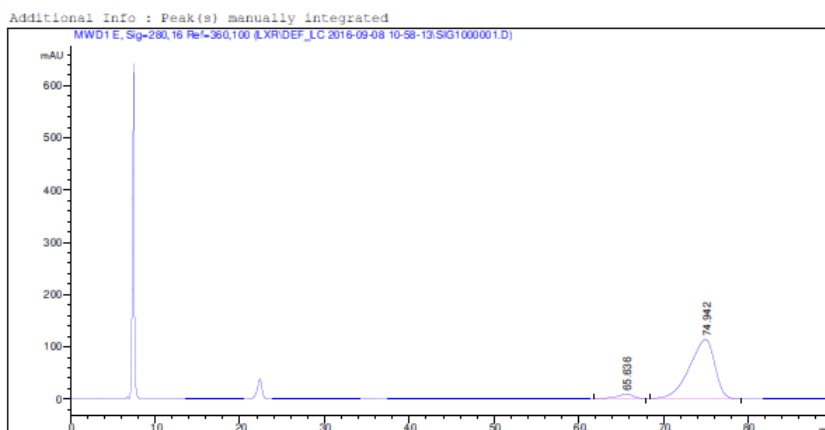

-----  
 Area Percent Report  
 -----

Sorted By : Signal  
 Multiplier: : 1.0000  
 Dilution: : 1.0000  
 Use Multiplier & Dilution Factor with ISTDs

Signal 1: MWD1 E, Sig=280,16 Ref=360,100

| Peak # | RetTime [min] | Type | Width [min] | Area [mAU*s] | Height [mAU] | Area %  |
|--------|---------------|------|-------------|--------------|--------------|---------|
| 1      | 65.636        | BB   | 1.5541      | 1144.09460   | 8.62197      | 4.6516  |
| 2      | 74.942        | BB   | 2.4382      | 2.34516e4    | 113.42535    | 95.3484 |

Figure s34. HPLC spectrum for phosphine sulfide 10' in Table 1 Entry 7.



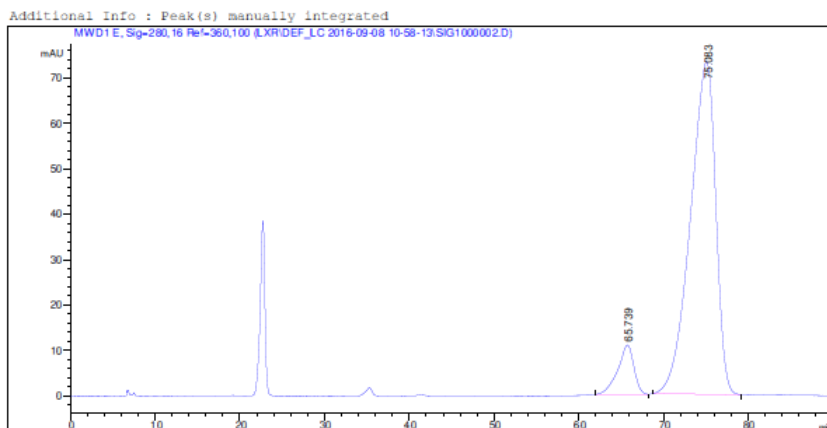

-----  
Area Percent Report  
-----

Sorted By : Signal  
Multiplier: : 1.0000  
Dilution: : 1.0000  
Use Multiplier & Dilution Factor with ISTDs

Signal 1: MWD1 E, Sig=280,16 Ref=360,100

| Peak # | RetTime [min] | Type | Width [min] | Area [mAU*s] | Height [mAU] | Area %  |
|--------|---------------|------|-------------|--------------|--------------|---------|
| 1      | 65.739        | BB   | 1.5539      | 1428.03503   | 10.84727     | 8.5892  |
| 2      | 75.083        | BB   | 2.4571      | 1.51980e4    | 73.29485     | 91.4108 |

**Figure s35.** HPLC spectrum for phosphine sulfide **10'** in Table 1 Entry 8.

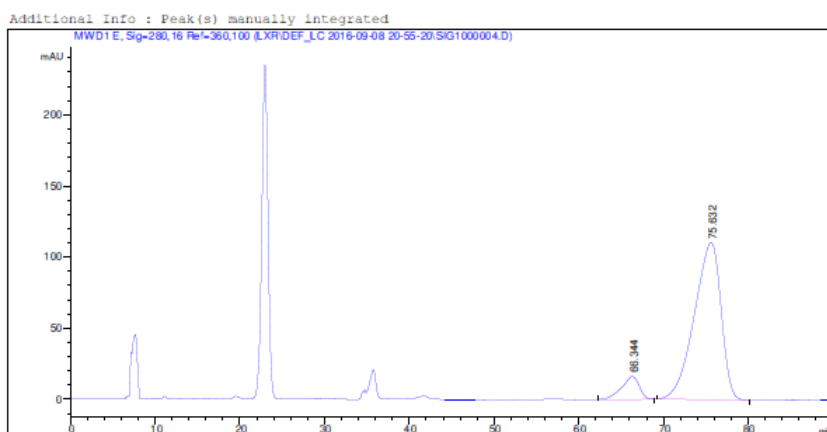

-----  
Area Percent Report  
-----

Sorted By : Signal  
Multiplier: : 1.0000  
Dilution: : 1.0000  
Use Multiplier & Dilution Factor with ISTDs

Signal 1: MWD1 E, Sig=280,16 Ref=360,100

| Peak # | RetTime [min] | Type | Width [min] | Area [mAU*s] | Height [mAU] | Area %  |
|--------|---------------|------|-------------|--------------|--------------|---------|
| 1      | 66.344        | BB   | 1.6915      | 2339.53784   | 16.19340     | 8.8152  |
| 2      | 75.632        | BB   | 2.6760      | 2.42003e4    | 110.45850    | 91.1848 |

**Figure s36.** HPLC spectrum for phosphine sulfide **10'** in Table 1 Entry 9.

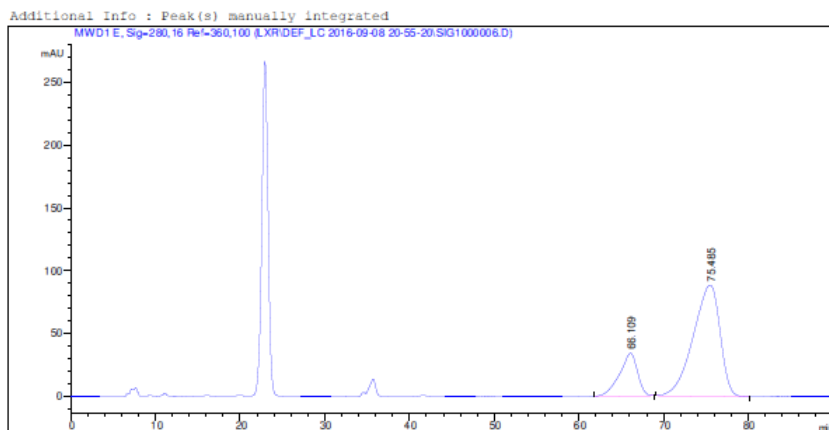

-----  
Area Percent Report  
-----

Sorted By : Signal  
Multiplier: : 1.0000  
Dilution: : 1.0000  
Use Multiplier & Dilution Factor with ISTDs

Signal 1: MWD1 E, Sig=280,16 Ref=360,100

| Peak # | RetTime [min] | Type | Width [min] | Area [mAU*s] | Height [mAU] | Area %  |
|--------|---------------|------|-------------|--------------|--------------|---------|
| 1      | 66.109        | BB   | 1.7563      | 5032.10059   | 34.08775     | 20.5084 |
| 2      | 75.485        | BB   | 2.5806      | 1.95047e4    | 88.65862     | 79.4916 |

Figure s37. HPLC spectrum for phosphine sulfide 10' in Table 1 Entry 10.

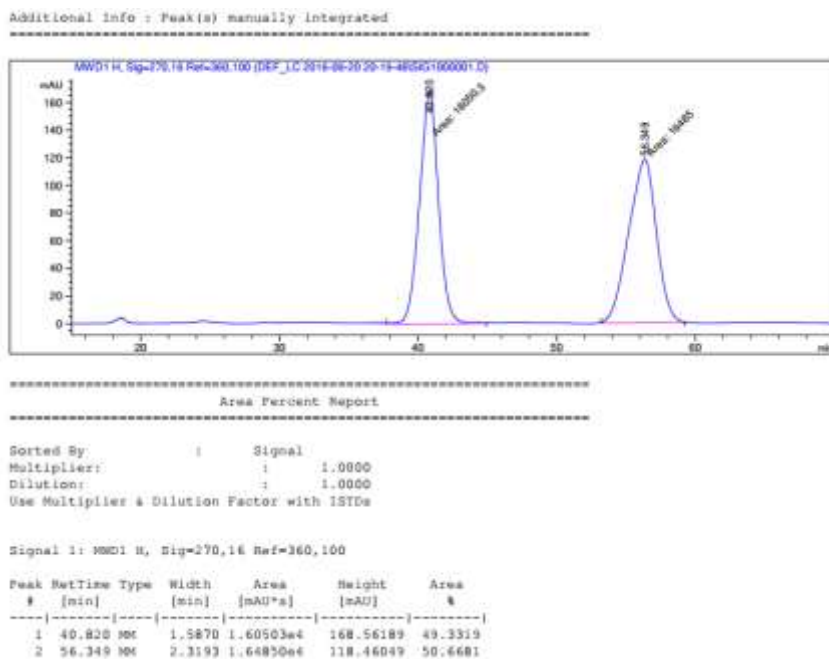

-----  
Area Percent Report  
-----

Sorted By : Signal  
Multiplier: : 1.0000  
Dilution: : 1.0000  
Use Multiplier & Dilution Factor with ISTDs

Signal 1: MWD1 H, Sig=270,16 Ref=360,100

| Peak # | RetTime [min] | Type | Width [min] | Area [mAU*s] | Height [mAU] | Area %  |
|--------|---------------|------|-------------|--------------|--------------|---------|
| 1      | 40.820        | 99C  | 1.5870      | 1.60503e4    | 168.56189    | 49.3319 |
| 2      | 56.349        | 99C  | 2.3193      | 1.64850e4    | 118.46049    | 50.6681 |

Figure s38. HPLC spectrum for racemic phosphine sulfide 17.

Additional Info : Peak(s) manually integrated

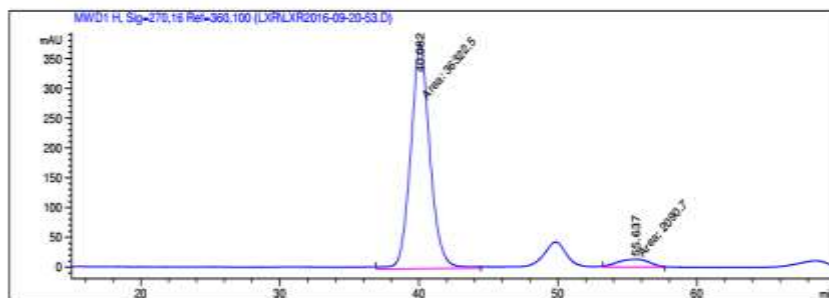

Area Percent Report

Sorted By : Signal  
Multiplier: : 1.0000  
Dilution: : 1.0000  
Sample Amount: : 1.00000 [mg/ul] (not used in calc.)  
Use Multiplier & Dilution Factor with ISTDs

Signal 1: MWD1 H, Sig=270,16 Ref=360,100

| Peak # | RetTime [min] | Type | Width [min] | Area [mAU*s] | Height [mAU] | Area %  |
|--------|---------------|------|-------------|--------------|--------------|---------|
| 1      | 40.082        | MM   | 1.6060      | 3.63225e4    | 376.95654    | 94.5573 |
| 2      | 55.637        | MM   | 2.6653      | 2090.69873   | 13.07367     | 5.4427  |

Figure s39. HPLC spectrum for phosphine sulfide 17 in Table 2 Entry 1.

Additional Info : Peak(s) manually integrated

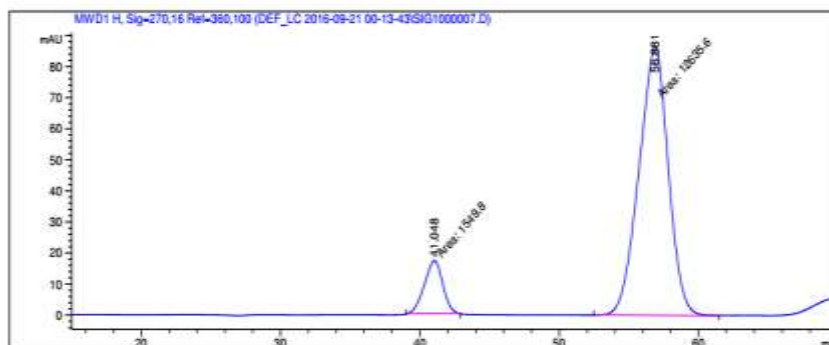

Area Percent Report

Sorted By : Signal  
Multiplier: : 1.0000  
Dilution: : 1.0000  
Use Multiplier & Dilution Factor with ISTDs

Signal 1: MWD1 H, Sig=270,16 Ref=360,100

| Peak # | RetTime [min] | Type | Width [min] | Area [mAU*s] | Height [mAU] | Area %  |
|--------|---------------|------|-------------|--------------|--------------|---------|
| 1      | 41.048        | MM   | 1.5204      | 1549.79517   | 16.98878     | 10.9253 |
| 2      | 56.881        | MM   | 2.4337      | 1.26356e4    | 86.53316     | 89.0747 |

Figure s40. HPLC spectrum for phosphine sulfide 17 in Table 2 Entry 2.

Additional Info : Peak(s) manually integrated

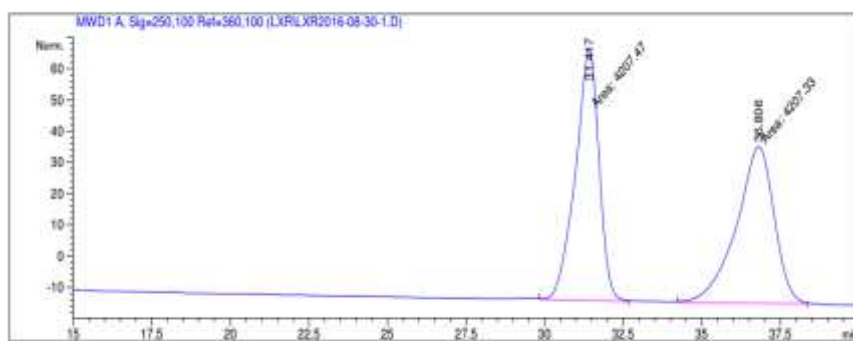

Area Percent Report

Sorted By : Signal  
Multiplier: : 1.0000  
Dilution: : 1.0000  
Sample Amount: : 1.00000 [ng/ul] (not used in calc.)  
Use Multiplier & Dilution Factor with ISTDs

Signal 1: MWD1 A, Sig=250,100 Ref=360,100

| Peak # | RetTime [min] | Type | Width [min] | Area [mAU*s] | Height [mAU] | Area %  |
|--------|---------------|------|-------------|--------------|--------------|---------|
| 1      | 31.417        | MM   | 0.8744      | 4207.47168   | 80.20103     | 50.0008 |
| 2      | 36.806        | MM   | 1.3969      | 4207.33447   | 50.19682     | 49.9992 |

Figure s41. HPLC spectrum for racemic phosphine sulfide 19.

Additional Info : Peak(s) manually integrated

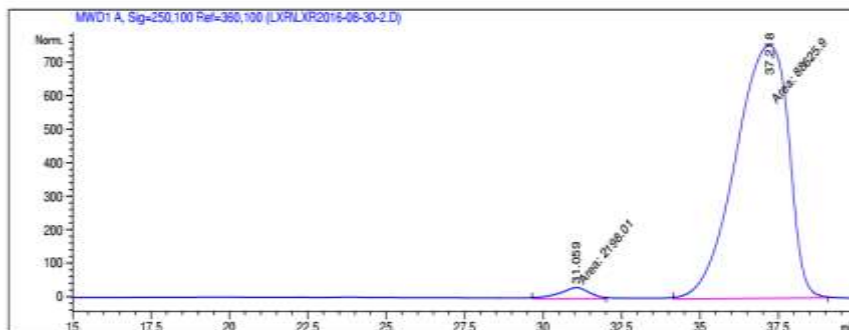

Area Percent Report

Sorted By : Signal  
Multiplier: : 1.0000  
Dilution: : 1.0000  
Sample Amount: : 1.00000 [ng/ul] (not used in calc.)  
Use Multiplier & Dilution Factor with ISTDs

Signal 1: MWD1 A, Sig=250,100 Ref=360,100

| Peak # | RetTime [min] | Type | Width [min] | Area [mAU*s] | Height [mAU] | Area %  |
|--------|---------------|------|-------------|--------------|--------------|---------|
| 1      | 31.059        | MM   | 1.1157      | 2198.01489   | 32.83495     | 2.4201  |
| 2      | 37.218        | MM   | 1.9567      | 8.86259e4    | 754.87421    | 97.5799 |

Figure s42. HPLC spectrum for phosphine sulfide 19 in Table 2 Entry 3.

Additional Info : Peak(s) manually integrated

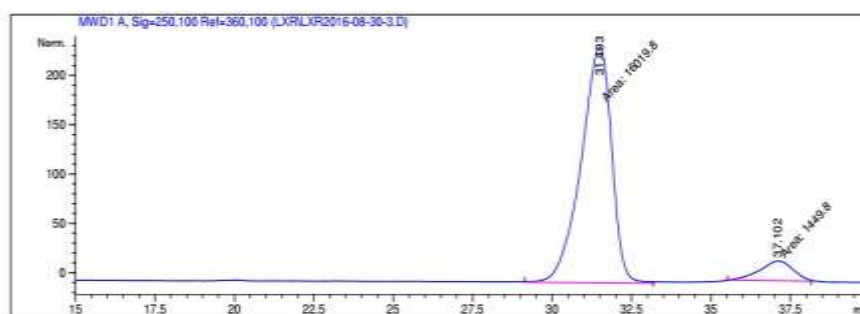

Area Percent Report

Sorted By : Signal  
Multiplier: : 1.0000  
Dilution: : 1.0000  
Sample Amount: : 1.00000 [ng/ul] (not used in calc.)  
Use Multiplier & Dilution Factor with ISTDs

Signal 1: MWD1 A, Sig=250,100 Ref=360,100

| Peak # | RetTime [min] | Type | Width [min] | Area [mAU*s] | Height [mAU] | Area %  |
|--------|---------------|------|-------------|--------------|--------------|---------|
| 1      | 31.493        | MM   | 1.1215      | 1.60198e4    | 238.07861    | 91.7010 |
| 2      | 37.102        | MM   | 1.2110      | 1449.79541   | 19.95266     | 8.2990  |

Figure s43. HPLC spectrum for phosphine sulfide 19 in Table 2 Entry 4.

Additional Info : Peak(s) manually integrated

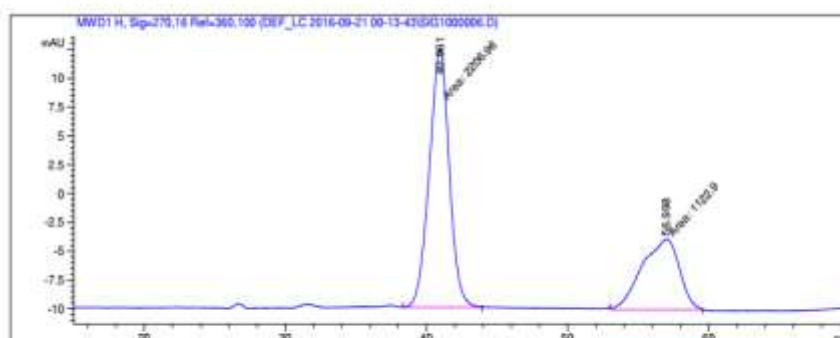

Area Percent Report

Sorted By : Signal  
Multiplier: : 1.0000  
Dilution: : 1.0000  
Use Multiplier & Dilution Factor with ISTDs

Signal 1: MWD1 H, Sig=270,16 Ref=360,100

| Peak # | RetTime [min] | Type | Width [min] | Area [mAU*s] | Height [mAU] | Area %  |
|--------|---------------|------|-------------|--------------|--------------|---------|
| 1      | 40.961        | MM   | 1.6429      | 2206.95605   | 22.38844     | 66.2779 |
| 2      | 56.998        | MM   | 3.0691      | 1122.89709   | 6.09792      | 33.7221 |

Figure s44. HPLC spectrum for phosphine sulfide 17 in Table 2 Entry 5.

### Selected Bond Lengths (Å) of Complexes 12b, 13, 15 and 20

The bond lengths of the CO<sub>2</sub>Me-moieties in complexes **12b**, **13**, **15** and **20** were collated in Table s1 below. The highlighted bond lengths of complex **12b** indicate the presence of delocalization along the O(1)-C(5)-C(6) moiety.

**Table s1.** Selected bond lengths (Å) of complexes **12b**, **13**, **15** and **18**.

|       | 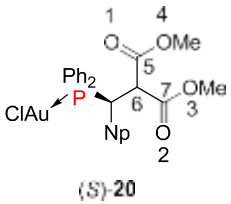<br>(S)-20 | <br>(S)-12b | <br>(S)-13 | <br>(S)-15 |
|-------|---------------------------------------------------------------------------------------------|----------------------------------------------------------------------------------------------|----------------------------------------------------------------------------------------------|-----------------------------------------------------------------------------------------------|
| C5-O1 | 1.182(13)                                                                                   | 1.274(5)                                                                                     | 1.206(9), 1.202(9)                                                                           | 1.205(7)                                                                                      |
| C5-O4 | 1.352(13)                                                                                   | 1.355(5)                                                                                     | 1.348(8), 1.334(9)                                                                           | 1.336(7)                                                                                      |
| C5-C6 | 1.507(17)                                                                                   | 1.397(6)                                                                                     | 1.527(9), 1.523(9)                                                                           | 1.523(7)                                                                                      |
| C6-C7 | 1.531(16)                                                                                   | 1.444(6)                                                                                     | 1.527(9), 1.528(13)                                                                          | 1.532(17)                                                                                     |
| C7-O2 | 1.209(15)                                                                                   | 1.216(5)                                                                                     | 1.209(9), 1.206(15)                                                                          | 1.205(17)                                                                                     |
| C7-O3 | 1.316(15)                                                                                   | 1.367(5)                                                                                     | 1.332(9), 1.348(17)                                                                          | 1.340(16)                                                                                     |

## Crystallographic Data

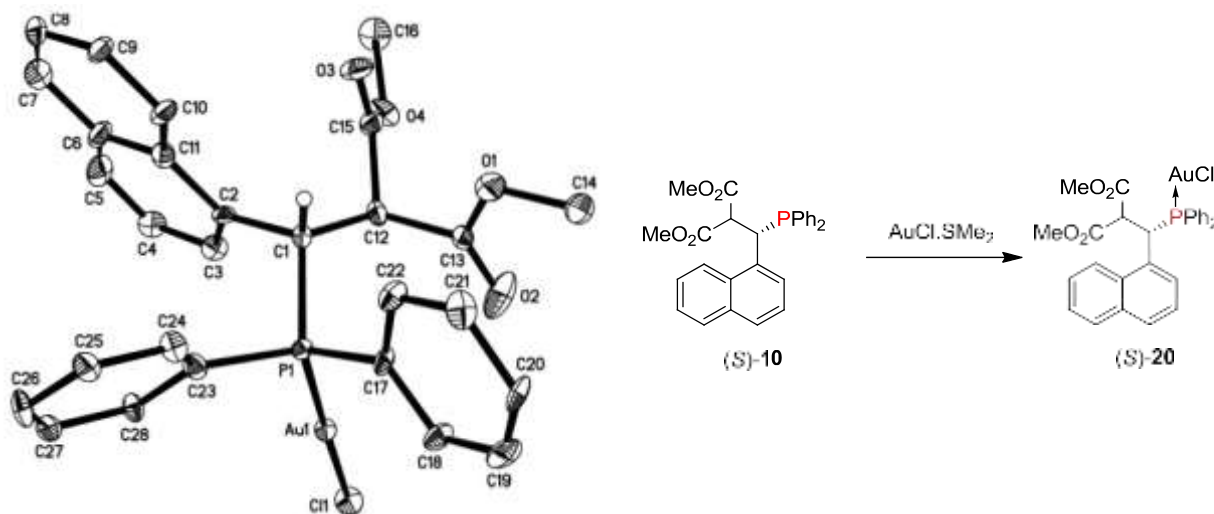

Figure s45. ORTEP structure of chiral phosphine-gold(I) complex (S)-20.

The tertiary phosphine **10** was coordinated onto AuCl to form complex **20**. Recrystallization of the complex from a mixture of DCM/*n*-hexane afforded single crystals that are suitable for X-ray crystallography. The absolute configuration of the major enantiomer was determined to be *S*.

Table s2. Data collection and structure refinement for complex (S)-20.

|                                        |                                                      |                 |
|----------------------------------------|------------------------------------------------------|-----------------|
| <b>Chemical formula</b>                | C <sub>28</sub> H <sub>25</sub> AuClO <sub>4</sub> P |                 |
| <b>Formula weight</b>                  | 688.87 g/mol                                         |                 |
| <b>Temperature</b>                     | 103(2) K                                             |                 |
| <b>Wavelength</b>                      | 0.71073 Å                                            |                 |
| <b>Crystal size</b>                    | 0.120 x 0.320 x 0.410 mm                             |                 |
| <b>Crystal habit</b>                   | colorless block                                      |                 |
| <b>Crystal system</b>                  | monoclinic                                           |                 |
| <b>Space group</b>                     | P 1 21 1                                             |                 |
| <b>Unit cell dimensions</b>            | a = 9.1660(5) Å                                      | α = 90°         |
|                                        | b = 16.3269(8) Å                                     | β = 115.576(3)° |
|                                        | c = 9.5017(5) Å                                      | γ = 90°         |
| <b>Volume</b>                          | 1282.62(12) Å <sup>3</sup>                           |                 |
| <b>Z</b>                               | 2                                                    |                 |
| <b>Density (calculated)</b>            | 1.784 g/cm <sup>3</sup>                              |                 |
| <b>Absorption coefficient</b>          | 5.934 mm <sup>-1</sup>                               |                 |
| <b>F(000)</b>                          | 672                                                  |                 |
| <b>Theta range for data collection</b> | 2.38 to 31.16°                                       |                 |
| <b>Index ranges</b>                    | -13 ≤ h ≤ 13, -23 ≤ k ≤ 23, -13 ≤ l ≤ 13             |                 |

|                                            |                                                       |                           |
|--------------------------------------------|-------------------------------------------------------|---------------------------|
| <b>Reflections collected</b>               | 21010                                                 |                           |
| <b>Independent reflections</b>             | 7935 [R(int) = 0.1079]                                |                           |
| <b>Coverage of independent reflections</b> | 99.8%                                                 |                           |
| <b>Absorption correction</b>               | Multi-Scan                                            |                           |
| <b>Max. and min. transmission</b>          | 0.5360 and 0.1950                                     |                           |
| <b>Structure solution technique</b>        | direct methods                                        |                           |
| <b>Structure solution program</b>          | XT, VERSION 2014/5                                    |                           |
| <b>Refinement method</b>                   | Full-matrix least-squares on F <sup>2</sup>           |                           |
| <b>Refinement program</b>                  | SHELXL-2014/7 (Sheldrick, 2014)                       |                           |
| <b>Function minimized</b>                  | $\Sigma w(F_o^2 - F_c^2)^2$                           |                           |
| <b>Data / restraints / parameters</b>      | 7935 / 1 / 318                                        |                           |
| <b>Goodness-of-fit on F<sup>2</sup></b>    | 0.905                                                 |                           |
| <b><math>\Delta/\sigma_{\max}</math></b>   | 0.001                                                 |                           |
| <b>Final R indices</b>                     | 6509 data; I > 2 $\sigma$ (I)                         | R1 = 0.0532, wR2 = 0.1112 |
|                                            | all data                                              | R1 = 0.0708, wR2 = 0.1219 |
| <b>Weighting scheme</b>                    | $w=1/[\sigma^2(F_o^2)]$<br>where $P=(F_o^2+2F_c^2)/3$ |                           |
| <b>Absolute structure parameter</b>        | 0.016(13)                                             |                           |
| <b>Largest diff. peak and hole</b>         | 1.302 and -1.929 eÅ <sup>-3</sup>                     |                           |
| <b>R.M.S. deviation from mean</b>          | 0.219 eÅ <sup>-3</sup>                                |                           |

**Table s3.** Bond lengths (Å) for complex (S)-20.

|         |           |         |           |
|---------|-----------|---------|-----------|
| Au1-P1  | 2.235(2)  | Au1-Cl1 | 2.283(2)  |
| C1-C2   | 1.518(14) | C1-C12  | 1.558(14) |
| C1-P1   | 1.847(11) | C2-C3   | 1.371(14) |
| C2-C11  | 1.436(15) | C3-C4   | 1.420(17) |
| C4-C5   | 1.336(18) | C5-C6   | 1.380(19) |
| C6-C11  | 1.428(17) | C6-C7   | 1.430(18) |
| C7-C8   | 1.355(19) | C8-C9   | 1.390(18) |
| C9-C10  | 1.371(16) | C10-C11 | 1.432(16) |
| C12-C15 | 1.507(17) | C12-C13 | 1.531(16) |
| C13-O2  | 1.209(15) | C13-O1  | 1.316(15) |
| C14-O1  | 1.47(2)   | C15-O3  | 1.182(13) |
| C15-O4  | 1.352(13) | C16-O4  | 1.431(15) |
| C17-C18 | 1.378(16) | C17-C22 | 1.395(15) |
| C17-P1  | 1.809(11) | C18-C19 | 1.357(16) |
| C19-C20 | 1.346(18) | C20-C21 | 1.401(18) |
| C21-C22 | 1.411(16) | C23-C24 | 1.381(14) |
| C23-C28 | 1.398(15) | C23-P1  | 1.826(13) |
| C24-C25 | 1.367(16) | C25-C26 | 1.403(19) |



|         |         |         |           |
|---------|---------|---------|-----------|
| C26-C27 | 1.37(2) | C27-C28 | 1.406(16) |
|---------|---------|---------|-----------|

**Table s4.** Bond angles (°) for complex (S)-**20**.

|             |           |             |           |
|-------------|-----------|-------------|-----------|
| P1-Au1-C11  | 178.3(2)  | C2-C1-C12   | 108.8(8)  |
| C2-C1-P1    | 111.7(7)  | C12-C1-P1   | 113.7(8)  |
| C3-C2-C11   | 119.4(11) | C3-C2-C1    | 119.0(10) |
| C11-C2-C1   | 121.5(9)  | C2-C3-C4    | 120.9(11) |
| C5-C4-C3    | 119.9(11) | C4-C5-C6    | 121.9(12) |
| C5-C6-C11   | 120.2(12) | C5-C6-C7    | 122.6(12) |
| C11-C6-C7   | 117.3(12) | C8-C7-C6    | 123.0(12) |
| C7-C8-C9    | 119.4(12) | C10-C9-C8   | 121.0(12) |
| C9-C10-C11  | 121.1(12) | C6-C11-C10  | 118.2(11) |
| C6-C11-C2   | 117.7(10) | C10-C11-C2  | 124.1(11) |
| C15-C12-C13 | 111.8(9)  | C15-C12-C1  | 106.9(9)  |
| C13-C12-C1  | 113.8(9)  | O2-C13-O1   | 125.6(12) |
| O2-C13-C12  | 122.1(11) | O1-C13-C12  | 112.3(10) |
| O3-C15-O4   | 124.7(11) | O3-C15-C12  | 125.4(11) |
| O4-C15-C12  | 109.9(9)  | C18-C17-C22 | 118.9(10) |
| C18-C17-P1  | 120.4(8)  | C22-C17-P1  | 120.6(9)  |
| C19-C18-C17 | 121.1(11) | C20-C19-C18 | 121.9(12) |
| C19-C20-C21 | 119.3(11) | C20-C21-C22 | 119.5(10) |
| C17-C22-C21 | 119.3(11) | C24-C23-C28 | 119.0(10) |
| C24-C23-P1  | 122.3(8)  | C28-C23-P1  | 118.4(8)  |
| C25-C24-C23 | 121.8(10) | C24-C25-C26 | 119.0(11) |
| C27-C26-C25 | 120.8(13) | C26-C27-C28 | 119.5(11) |
| C23-C28-C27 | 119.8(9)  | C13-O1-C14  | 114.6(13) |
| C15-O4-C16  | 114.8(9)  | C17-P1-C23  | 105.9(5)  |
| C17-P1-C1   | 106.1(5)  | C23-P1-C1   | 104.2(5)  |
| C17-P1-Au1  | 113.5(4)  | C23-P1-Au1  | 113.9(4)  |
| C1-P1-Au1   | 112.4(3)  |             |           |

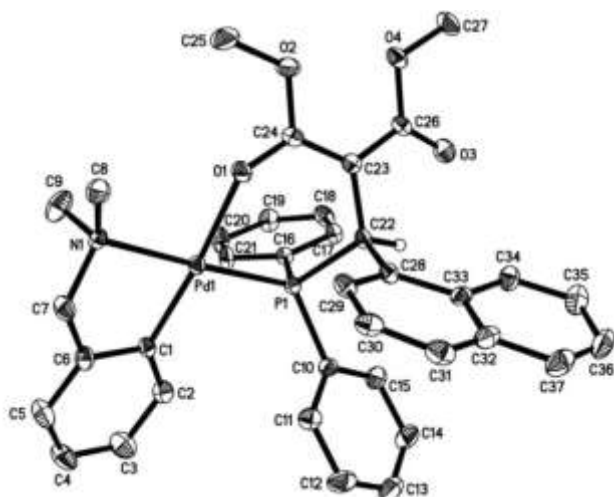

Figure s46. ORTEP structure of chiral phosphine-palladium complex (*S*)-12b.

Table s5. Data collection and structure refinement for complex (*S*)-12b.

|                                            |                                                                     |                   |
|--------------------------------------------|---------------------------------------------------------------------|-------------------|
| <b>Chemical formula</b>                    | C <sub>38</sub> H <sub>37</sub> Cl <sub>3</sub> NO <sub>4</sub> PPd |                   |
| <b>Formula weight</b>                      | 815.40 g/mol                                                        |                   |
| <b>Temperature</b>                         | 153(2) K                                                            |                   |
| <b>Wavelength</b>                          | 0.71073 Å                                                           |                   |
| <b>Crystal size</b>                        | 0.380 x 0.400 x 0.420 mm                                            |                   |
| <b>Crystal habit</b>                       | colorless block                                                     |                   |
| <b>Crystal system</b>                      | monoclinic                                                          |                   |
| <b>Space group</b>                         | P 1 21 1                                                            |                   |
| <b>Unit cell dimensions</b>                | a = 9.4544(4) Å                                                     | α = 90°           |
|                                            | b = 15.4951(6) Å                                                    | β = 109.9464(16)° |
|                                            | c = 12.6849(5) Å                                                    | γ = 90°           |
| <b>Volume</b>                              | 1746.82(12) Å <sup>3</sup>                                          |                   |
| <b>Z</b>                                   | 2                                                                   |                   |
| <b>Density (calculated)</b>                | 1.550 g/cm <sup>3</sup>                                             |                   |
| <b>Absorption coefficient</b>              | 0.849 mm <sup>-1</sup>                                              |                   |
| <b>F(000)</b>                              | 832                                                                 |                   |
| <b>Theta range for data collection</b>     | 1.71 to 34.03°                                                      |                   |
| <b>Index ranges</b>                        | -12 ≤ h ≤ 14, -24 ≤ k ≤ 24, -19 ≤ l ≤ 19                            |                   |
| <b>Reflections collected</b>               | 38476                                                               |                   |
| <b>Independent reflections</b>             | 14147 [R(int) = 0.0777]                                             |                   |
| <b>Coverage of independent reflections</b> | 99.3%                                                               |                   |
| <b>Absorption correction</b>               | Multi-Scan                                                          |                   |
| <b>Max. and min. transmission</b>          | 0.7390 and 0.7170                                                   |                   |

|                                          |                                                                                                                         |
|------------------------------------------|-------------------------------------------------------------------------------------------------------------------------|
| <b>Structure solution technique</b>      | direct methods                                                                                                          |
| <b>Structure solution program</b>        | XT, VERSION 2014/5                                                                                                      |
| <b>Refinement method</b>                 | Full-matrix least-squares on F <sup>2</sup>                                                                             |
| <b>Refinement program</b>                | SHELXL-2014/7 (Sheldrick, 2014)                                                                                         |
| <b>Function minimized</b>                | $\Sigma w(F_o^2 - F_c^2)^2$                                                                                             |
| <b>Data / restraints / parameters</b>    | 14147 / 1 / 437                                                                                                         |
| <b>Goodness-of-fit on F<sup>2</sup></b>  | 1.024                                                                                                                   |
| <b><math>\Delta/\sigma_{\max}</math></b> | 0.001                                                                                                                   |
| <b>Final R indices</b>                   | 11864 data; I>2 $\sigma$ (I) R1 = 0.0493, wR2 = 0.1081<br>all data R1 = 0.0656, wR2 = 0.1181                            |
| <b>Weighting scheme</b>                  | w=1/[ $\sigma^2(F_o^2)+(0.0424P)^2+0.0709P$ ]<br>where P=(F <sub>o</sub> <sup>2</sup> +2F <sub>c</sub> <sup>2</sup> )/3 |
| <b>Absolute structure parameter</b>      | -0.017(17)                                                                                                              |
| <b>Largest diff. peak and hole</b>       | 0.870 and -1.541 eÅ <sup>-3</sup>                                                                                       |
| <b>R.M.S. deviation from mean</b>        | 0.117 eÅ <sup>-3</sup>                                                                                                  |

**Table s6.** Bond lengths (Å) for complex (S)-**12b**.

|         |          |         |          |
|---------|----------|---------|----------|
| C1-C2   | 1.400(6) | C1-C6   | 1.413(6) |
| C1-Pd1  | 1.997(4) | C2-C3   | 1.395(7) |
| C3-C4   | 1.367(8) | C4-C5   | 1.386(7) |
| C5-C6   | 1.385(7) | C6-C7   | 1.503(6) |
| C7-N1   | 1.480(6) | C8-N1   | 1.471(6) |
| C9-N1   | 1.487(6) | C10-C11 | 1.384(7) |
| C10-C15 | 1.390(6) | C10-P1  | 1.823(4) |
| C11-C12 | 1.391(7) | C12-C13 | 1.376(8) |
| C13-C14 | 1.386(8) | C14-C15 | 1.392(7) |
| C16-C21 | 1.388(7) | C16-C17 | 1.390(6) |
| C16-P1  | 1.827(4) | C17-C18 | 1.395(6) |
| C18-C19 | 1.385(8) | C19-C20 | 1.384(7) |
| C20-C21 | 1.378(7) | C22-C23 | 1.510(6) |
| C22-C28 | 1.520(6) | C22-P1  | 1.849(4) |
| C23-C24 | 1.397(6) | C23-C26 | 1.444(6) |
| C24-O1  | 1.274(5) | C24-O2  | 1.355(5) |
| C25-O2  | 1.430(6) | C26-O3  | 1.216(5) |
| C26-O4  | 1.367(5) | C27-O4  | 1.432(6) |
| C28-C29 | 1.374(6) | C28-C33 | 1.445(6) |
| C29-C30 | 1.413(7) | C30-C31 | 1.360(7) |
| C31-C32 | 1.422(7) | C32-C37 | 1.410(7) |
| C32-C33 | 1.430(7) | C33-C34 | 1.420(7) |
| C34-C35 | 1.374(7) | C35-C36 | 1.419(8) |

|         |            |         |          |
|---------|------------|---------|----------|
| C36-C37 | 1.350(9)   | C38-Cl3 | 1.739(6) |
| C38-Cl1 | 1.746(5)   | C38-Cl2 | 1.777(6) |
| N1-Pd1  | 2.144(3)   | O1-Pd1  | 2.123(3) |
| P1-Pd1  | 2.2277(10) |         |          |

**Table s7.** Bond angles (°) for complex (S)-**12b**.

|             |          |             |          |
|-------------|----------|-------------|----------|
| C2-C1-C6    | 117.4(4) | C2-C1-Pd1   | 130.7(3) |
| C6-C1-Pd1   | 111.8(3) | C3-C2-C1    | 120.9(4) |
| C4-C3-C2    | 120.8(5) | C3-C4-C5    | 119.3(5) |
| C6-C5-C4    | 121.1(5) | C5-C6-C1    | 120.4(4) |
| C5-C6-C7    | 121.6(4) | C1-C6-C7    | 117.9(4) |
| N1-C7-C6    | 108.8(4) | C11-C10-C15 | 119.3(4) |
| C11-C10-P1  | 119.3(3) | C15-C10-P1  | 121.1(4) |
| C10-C11-C12 | 120.0(5) | C13-C12-C11 | 120.7(5) |
| C12-C13-C14 | 119.8(5) | C13-C14-C15 | 119.8(5) |
| C10-C15-C14 | 120.5(5) | C21-C16-C17 | 119.1(4) |
| C21-C16-P1  | 117.9(3) | C17-C16-P1  | 123.0(3) |
| C16-C17-C18 | 120.0(4) | C19-C18-C17 | 120.1(4) |
| C20-C19-C18 | 119.7(4) | C21-C20-C19 | 120.2(4) |
| C20-C21-C16 | 120.8(4) | C23-C22-C28 | 116.0(3) |
| C23-C22-P1  | 113.6(3) | C28-C22-P1  | 109.8(3) |
| C24-C23-C26 | 126.1(4) | C24-C23-C22 | 119.5(4) |
| C26-C23-C22 | 114.3(4) | O1-C24-O2   | 116.1(4) |
| O1-C24-C23  | 126.4(4) | O2-C24-C23  | 117.5(4) |
| O3-C26-O4   | 120.3(4) | O3-C26-C23  | 124.0(4) |
| O4-C26-C23  | 115.7(4) | C29-C28-C33 | 118.5(4) |
| C29-C28-C22 | 121.8(4) | C33-C28-C22 | 119.7(4) |
| C28-C29-C30 | 121.9(4) | C31-C30-C29 | 121.1(5) |
| C30-C31-C32 | 119.5(4) | C37-C32-C31 | 120.4(5) |
| C37-C32-C33 | 119.4(5) | C31-C32-C33 | 120.1(4) |
| C34-C33-C32 | 117.4(4) | C34-C33-C28 | 123.8(4) |
| C32-C33-C28 | 118.7(4) | C35-C34-C33 | 121.7(5) |
| C34-C35-C36 | 119.5(5) | C37-C36-C35 | 120.4(5) |
| C36-C37-C32 | 121.4(5) | Cl3-C38-Cl1 | 111.8(3) |
| Cl3-C38-Cl2 | 110.1(3) | Cl1-C38-Cl2 | 109.9(3) |
| C8-N1-C7    | 109.4(4) | C8-N1-C9    | 109.6(4) |
| C7-N1-C9    | 109.9(4) | C8-N1-Pd1   | 115.4(3) |
| C7-N1-Pd1   | 105.2(2) | C9-N1-Pd1   | 107.3(3) |
| C24-O1-Pd1  | 133.6(3) | C24-O2-C25  | 116.7(4) |
| C26-O4-C27  | 114.7(4) | C10-P1-C16  | 106.2(2) |

|            |            |            |            |
|------------|------------|------------|------------|
| C10-P1-C22 | 100.42(19) | C16-P1-C22 | 106.36(19) |
| C10-P1-Pd1 | 122.52(15) | C16-P1-Pd1 | 109.67(14) |
| C22-P1-Pd1 | 110.42(14) | C1-Pd1-O1  | 173.37(15) |
| C1-Pd1-N1  | 82.32(15)  | O1-Pd1-N1  | 91.12(13)  |
| C1-Pd1-P1  | 98.78(12)  | O1-Pd1-P1  | 87.82(9)   |
| N1-Pd1-P1  | 176.45(10) |            |            |

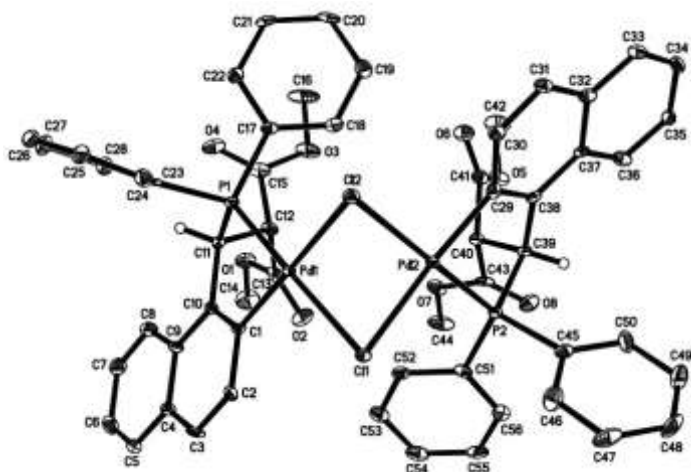

Figure s47. ORTEP structure of chiral phosphine-palladium complex (S)-13.

Table s8. Data collection and structure refinement for complex (S)-13.

|                                            |                                                                                                                                        |
|--------------------------------------------|----------------------------------------------------------------------------------------------------------------------------------------|
| <b>Chemical formula</b>                    | $C_{57}H_{50}Cl_4O_8P_2Pd_2$                                                                                                           |
| <b>Formula weight</b>                      | 1279.51 g/mol                                                                                                                          |
| <b>Temperature</b>                         | 103(2) K                                                                                                                               |
| <b>Wavelength</b>                          | 1.54178 Å                                                                                                                              |
| <b>Crystal size</b>                        | 0.060 x 0.140 x 0.160 mm                                                                                                               |
| <b>Crystal habit</b>                       | yellow block                                                                                                                           |
| <b>Crystal system</b>                      | monoclinic                                                                                                                             |
| <b>Space group</b>                         | P 1 21 1                                                                                                                               |
| <b>Unit cell dimensions</b>                | $a = 10.97000(10)$ Å $\alpha = 90^\circ$<br>$b = 19.8122(2)$ Å $\beta = 108.4988(6)^\circ$<br>$c = 12.56070(10)$ Å $\gamma = 90^\circ$ |
| <b>Volume</b>                              | $2588.89(4)$ Å <sup>3</sup>                                                                                                            |
| <b>Z</b>                                   | 2                                                                                                                                      |
| <b>Density (calculated)</b>                | 1.641 g/cm <sup>3</sup>                                                                                                                |
| <b>Absorption coefficient</b>              | 8.553 mm <sup>-1</sup>                                                                                                                 |
| <b>F(000)</b>                              | 1292                                                                                                                                   |
| <b>Theta range for data collection</b>     | 3.71 to 67.52°                                                                                                                         |
| <b>Index ranges</b>                        | -12 ≤ h ≤ 13, -23 ≤ k ≤ 23, -14 ≤ l ≤ 14                                                                                               |
| <b>Reflections collected</b>               | 29310                                                                                                                                  |
| <b>Independent reflections</b>             | 8900 [R(int) = 0.0486]                                                                                                                 |
| <b>Coverage of independent reflections</b> | 97.8%                                                                                                                                  |
| <b>Absorption correction</b>               | Multi-Scan                                                                                                                             |
| <b>Max. and min. transmission</b>          | 0.6280 and 0.3420                                                                                                                      |
| <b>Structure solution technique</b>        | direct methods                                                                                                                         |
| <b>Structure solution program</b>          | XT, VERSION 2014/5                                                                                                                     |

|                                            |                                                                               |                           |
|--------------------------------------------|-------------------------------------------------------------------------------|---------------------------|
| <b>Refinement method</b>                   | Full-matrix least-squares on $F^2$                                            |                           |
| <b>Refinement program</b>                  | SHELXL-2014/7 (Sheldrick, 2014)                                               |                           |
| <b>Function minimized</b>                  | $\Sigma w(F_o^2 - F_c^2)^2$                                                   |                           |
| <b>Data / restraints / parameters</b>      | 8900 / 200 / 701                                                              |                           |
| <b>Goodness-of-fit on <math>F^2</math></b> | 1.063                                                                         |                           |
| <b>Final R indices</b>                     | 8525 data; $I > 2\sigma(I)$                                                   | R1 = 0.0325, wR2 = 0.0816 |
|                                            | all data                                                                      | R1 = 0.0340, wR2 = 0.0829 |
| <b>Weighting scheme</b>                    | $w = 1 / [\sigma^2(F_o^2) + (0.0422P)^2]$<br>where $P = (F_o^2 + 2F_c^2) / 3$ |                           |
| <b>Absolute structure parameter</b>        | 0.013(8)                                                                      |                           |
| <b>Largest diff. peak and hole</b>         | 0.587 and -1.454 $e\text{\AA}^{-3}$                                           |                           |
| <b>R.M.S. deviation from mean</b>          | 0.142 $e\text{\AA}^{-3}$                                                      |                           |

**Table S9.** Bond lengths ( $\text{\AA}$ ) for complex (S)-13.

|         |           |         |           |
|---------|-----------|---------|-----------|
| C1-C10  | 1.380(9)  | C1-C2   | 1.427(9)  |
| C1-Pd1  | 2.001(6)  | C2-C3   | 1.370(10) |
| C3-C4   | 1.424(11) | C4-C5   | 1.409(10) |
| C4-C9   | 1.433(9)  | C5-C6   | 1.362(11) |
| C6-C7   | 1.408(11) | C7-C8   | 1.374(11) |
| C8-C9   | 1.411(10) | C9-C10  | 1.430(9)  |
| C10-C11 | 1.518(8)  | C11-C12 | 1.555(10) |
| C11-P1  | 1.855(6)  | C12-C13 | 1.527(9)  |
| C12-C15 | 1.527(9)  | C13-O2  | 1.206(9)  |
| C13-O1  | 1.348(8)  | C14-O1  | 1.452(9)  |
| C15-O4  | 1.209(9)  | C15-O3  | 1.332(9)  |
| C16-O3  | 1.468(9)  | C17-C18 | 1.393(10) |
| C17-C22 | 1.396(10) | C17-P1  | 1.822(6)  |
| C18-C19 | 1.409(10) | C19-C20 | 1.377(11) |
| C20-C21 | 1.381(11) | C21-C22 | 1.394(10) |
| C23-C28 | 1.391(10) | C23-C24 | 1.396(10) |
| C23-P1  | 1.816(7)  | C24-C25 | 1.393(11) |
| C25-C26 | 1.382(11) | C26-C27 | 1.388(11) |
| C27-C28 | 1.402(11) | C29-C38 | 1.387(10) |
| C29-C30 | 1.421(9)  | C29-Pd2 | 2.017(7)  |
| C30-C31 | 1.378(10) | C31-C32 | 1.416(10) |
| C32-C33 | 1.413(10) | C32-C37 | 1.429(10) |
| C33-C34 | 1.376(10) | C34-C35 | 1.410(10) |
| C35-C36 | 1.380(10) | C36-C37 | 1.413(10) |
| C37-C38 | 1.436(10) | C38-C39 | 1.506(9)  |
| C39-C40 | 1.564(9)  | C39-P2  | 1.851(6)  |

|          |            |          |            |
|----------|------------|----------|------------|
| C40-C41A | 1.52(2)    | C40-C43  | 1.523(9)   |
| C40-C41  | 1.528(13)  | C41-O6   | 1.206(15)  |
| C41-O5   | 1.348(17)  | C42-O5   | 1.470(14)  |
| C41A-O6A | 1.20(2)    | C41A-O5A | 1.33(2)    |
| C42A-O5A | 1.47(2)    | C43-O8   | 1.202(9)   |
| C43-O7   | 1.334(9)   | C44-O7   | 1.444(9)   |
| C45-C46  | 1.388(11)  | C45-C50  | 1.390(10)  |
| C45-P2   | 1.804(7)   | C46-C47  | 1.403(11)  |
| C47-C48  | 1.389(13)  | C48-C49  | 1.392(12)  |
| C49-C50  | 1.381(11)  | C51-C52  | 1.408(10)  |
| C51-C56  | 1.421(10)  | C51-P2   | 1.797(7)   |
| C52-C53  | 1.379(10)  | C53-C54  | 1.404(11)  |
| C54-C55  | 1.398(11)  | C55-C56  | 1.375(11)  |
| C57-Cl4  | 1.755(10)  | C57-Cl3  | 1.763(8)   |
| Cl1-Pd1  | 2.4300(15) | Cl1-Pd2  | 2.4322(15) |
| Cl2-Pd2  | 2.4461(17) | Cl2-Pd1  | 2.4521(14) |
| P1-Pd1   | 2.1983(16) | P2-Pd2   | 2.2008(17) |
| Pd1-Pd2  | 2.9813(6)  |          |            |

**Table s10.** Bond angles (°) for complex (*S*)-**13**.

|             |          |             |          |
|-------------|----------|-------------|----------|
| C10-C1-C2   | 119.4(6) | C10-C1-Pd1  | 123.2(4) |
| C2-C1-Pd1   | 117.3(5) | C3-C2-C1    | 120.9(6) |
| C2-C3-C4    | 120.9(6) | C5-C4-C3    | 121.3(6) |
| C5-C4-C9    | 119.8(6) | C3-C4-C9    | 118.9(6) |
| C6-C5-C4    | 121.6(7) | C5-C6-C7    | 119.3(7) |
| C8-C7-C6    | 120.5(7) | C7-C8-C9    | 121.9(6) |
| C8-C9-C10   | 124.4(6) | C8-C9-C4    | 116.9(6) |
| C10-C9-C4   | 118.7(6) | C1-C10-C9   | 121.2(5) |
| C1-C10-C11  | 117.9(5) | C9-C10-C11  | 120.7(5) |
| C10-C11-C12 | 116.6(6) | C10-C11-P1  | 102.2(4) |
| C12-C11-P1  | 109.6(4) | C13-C12-C15 | 110.7(5) |
| C13-C12-C11 | 111.8(5) | C15-C12-C11 | 109.7(5) |
| O2-C13-O1   | 124.2(6) | O2-C13-C12  | 124.4(6) |
| O1-C13-C12  | 111.4(6) | O4-C15-O3   | 125.1(6) |
| O4-C15-C12  | 124.9(6) | O3-C15-C12  | 110.0(6) |
| C18-C17-C22 | 119.5(6) | C18-C17-P1  | 118.6(5) |
| C22-C17-P1  | 121.8(5) | C17-C18-C19 | 119.8(6) |
| C20-C19-C18 | 119.9(7) | C19-C20-C21 | 120.5(6) |
| C20-C21-C22 | 120.2(6) | C21-C22-C17 | 120.0(6) |
| C28-C23-C24 | 120.2(6) | C28-C23-P1  | 122.1(6) |



|              |           |               |           |
|--------------|-----------|---------------|-----------|
| C24-C23-P1   | 117.6(5)  | C25-C24-C23   | 120.0(7)  |
| C26-C25-C24  | 119.6(7)  | C25-C26-C27   | 121.1(7)  |
| C26-C27-C28  | 119.5(7)  | C23-C28-C27   | 119.6(7)  |
| C38-C29-C30  | 120.0(6)  | C38-C29-Pd2   | 122.2(5)  |
| C30-C29-Pd2  | 117.7(5)  | C31-C30-C29   | 120.2(6)  |
| C30-C31-C32  | 121.3(6)  | C33-C32-C31   | 121.3(6)  |
| C33-C32-C37  | 119.6(6)  | C31-C32-C37   | 119.0(6)  |
| C34-C33-C32  | 120.5(6)  | C33-C34-C35   | 120.4(6)  |
| C36-C35-C34  | 120.1(6)  | C35-C36-C37   | 121.0(6)  |
| C36-C37-C32  | 118.3(6)  | C36-C37-C38   | 122.8(6)  |
| C32-C37-C38  | 118.8(6)  | C29-C38-C37   | 120.4(6)  |
| C29-C38-C39  | 118.2(6)  | C37-C38-C39   | 121.4(6)  |
| C38-C39-C40  | 113.4(5)  | C38-C39-P2    | 101.7(4)  |
| C40-C39-P2   | 109.1(4)  | C41A-C40-C43  | 108.(2)   |
| C43-C40-C41  | 109.9(10) | C41A-C40-C39  | 115.(4)   |
| C43-C40-C39  | 110.3(5)  | C41-C40-C39   | 112.0(17) |
| O6-C41-O5    | 123.3(15) | O6-C41-C40    | 125.4(16) |
| O5-C41-C40   | 111.1(14) | C41-O5-C42    | 113.4(14) |
| O6A-C41A-O5A | 129.(3)   | O6A-C41A-C40  | 120.(3)   |
| O5A-C41A-C40 | 111.(2)   | C41A-O5A-C42A | 115.(3)   |
| O8-C43-O7    | 125.0(6)  | O8-C43-C40    | 124.8(6)  |
| O7-C43-C40   | 110.1(6)  | C46-C45-C50   | 119.4(7)  |
| C46-C45-P2   | 116.7(5)  | C50-C45-P2    | 123.7(6)  |
| C45-C46-C47  | 120.1(7)  | C48-C47-C46   | 119.8(7)  |
| C47-C48-C49  | 119.7(7)  | C50-C49-C48   | 120.3(8)  |
| C49-C50-C45  | 120.6(7)  | C52-C51-C56   | 118.5(6)  |
| C52-C51-P2   | 120.9(5)  | C56-C51-P2    | 120.6(5)  |
| C53-C52-C51  | 120.6(7)  | C52-C53-C54   | 120.2(7)  |
| C55-C54-C53  | 119.9(7)  | C56-C55-C54   | 120.1(7)  |
| C55-C56-C51  | 120.7(7)  | C14-C57-C13   | 111.7(5)  |
| Pd1-C11-Pd2  | 75.64(4)  | Pd2-C12-Pd1   | 74.98(4)  |
| C13-O1-C14   | 115.1(6)  | C15-O3-C16    | 115.0(7)  |
| C43-O7-C44   | 114.6(6)  | C23-P1-C17    | 105.5(3)  |
| C23-P1-C11   | 106.7(3)  | C17-P1-C11    | 109.8(3)  |
| C23-P1-Pd1   | 115.2(2)  | C17-P1-Pd1    | 115.1(2)  |
| C11-P1-Pd1   | 104.1(2)  | C51-P2-C45    | 103.8(3)  |
| C51-P2-C39   | 108.8(3)  | C45-P2-C39    | 107.5(3)  |
| C51-P2-Pd2   | 118.8(2)  | C45-P2-Pd2    | 113.3(2)  |
| C39-P2-Pd2   | 104.2(2)  | C1-Pd1-P1     | 79.93(18) |
| C1-Pd1-C11   | 95.85(18) | P1-Pd1-C11    | 170.35(6) |
| C1-Pd1-C12   | 177.2(2)  | P1-Pd1-C12    | 100.86(5) |

|             |            |             |            |
|-------------|------------|-------------|------------|
| Cl1-Pd1-Cl2 | 83.78(5)   | C1-Pd1-Pd2  | 129.3(2)   |
| P1-Pd1-Pd2  | 124.43(4)  | Cl1-Pd1-Pd2 | 52.21(4)   |
| Cl2-Pd1-Pd2 | 52.42(4)   | C29-Pd2-P2  | 80.3(2)    |
| C29-Pd2-Cl1 | 175.41(19) | P2-Pd2-Cl1  | 97.72(6)   |
| C29-Pd2-Cl2 | 98.5(2)    | P2-Pd2-Cl2  | 174.15(6)  |
| Cl1-Pd2-Cl2 | 83.86(5)   | C29-Pd2-Pd1 | 132.32(19) |
| P2-Pd2-Pd1  | 124.32(4)  | Cl1-Pd2-Pd1 | 52.15(4)   |
| Cl2-Pd2-Pd1 | 52.60(3)   |             |            |

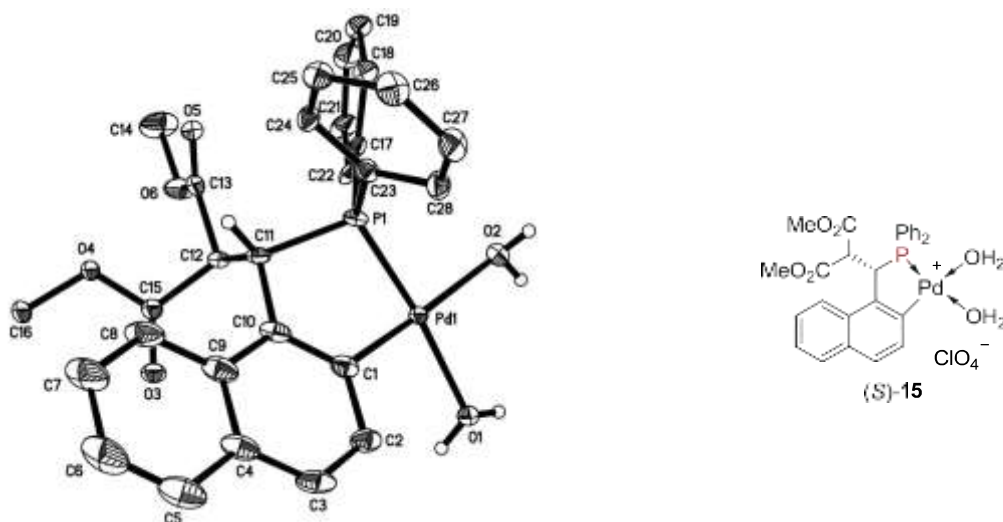

Figure s48. ORTEP structure of chiral phosphine-palladium complex (S)-15.

Table s11. Data collection and structure refinement for complex (S)-13.

|                                            |                                                       |         |
|--------------------------------------------|-------------------------------------------------------|---------|
| <b>Chemical formula</b>                    | C <sub>28</sub> H <sub>30</sub> ClO <sub>11</sub> PPd |         |
| <b>Formula weight</b>                      | 715.34 g/mol                                          |         |
| <b>Temperature</b>                         | 103(2) K                                              |         |
| <b>Wavelength</b>                          | 1.54178 Å                                             |         |
| <b>Crystal size</b>                        | 0.080 x 0.100 x 0.200 mm                              |         |
| <b>Crystal habit</b>                       | colorless block                                       |         |
| <b>Crystal system</b>                      | orthorhombic                                          |         |
| <b>Space group</b>                         | P 21 21 21                                            |         |
| <b>Unit cell dimensions</b>                | a = 10.62424(9) Å                                     | α = 90° |
|                                            | b = 10.81406(10) Å                                    | β = 90° |
|                                            | c = 25.3404(2) Å                                      | γ = 90° |
| <b>Volume</b>                              | 2911.39(4) Å <sup>3</sup>                             |         |
| <b>Z</b>                                   | 4                                                     |         |
| <b>Density (calculated)</b>                | 1.632 g/cm <sup>3</sup>                               |         |
| <b>Absorption coefficient</b>              | 7.035 mm <sup>-1</sup>                                |         |
| <b>F(000)</b>                              | 1456                                                  |         |
| <b>Theta range for data collection</b>     | 3.49 to 67.38°                                        |         |
| <b>Index ranges</b>                        | -12 ≤ h ≤ 12, -12 ≤ k ≤ 11, -29 ≤ l ≤ 30              |         |
| <b>Reflections collected</b>               | 14284                                                 |         |
| <b>Independent reflections</b>             | 5015 [R(int) = 0.0321]                                |         |
| <b>Coverage of independent reflections</b> | 99.0%                                                 |         |
| <b>Absorption correction</b>               | Multi-Scan                                            |         |
| <b>Max. and min. transmission</b>          | 0.6030 and 0.3340                                     |         |
| <b>Structure solution technique</b>        | direct methods                                        |         |
| <b>Structure solution program</b>          | XT, VERSION 2014/5                                    |         |

|                                            |                                                                           |                           |
|--------------------------------------------|---------------------------------------------------------------------------|---------------------------|
| <b>Refinement method</b>                   | Full-matrix least-squares on $F^2$                                        |                           |
| <b>Refinement program</b>                  | SHELXL-2014/7 (Sheldrick, 2014)                                           |                           |
| <b>Function minimized</b>                  | $\Sigma w(F_o^2 - F_c^2)^2$                                               |                           |
| <b>Data / restraints / parameters</b>      | 5015 / 953 / 562                                                          |                           |
| <b>Goodness-of-fit on <math>F^2</math></b> | 1.023                                                                     |                           |
| $\Delta/\sigma_{\max}$                     | 0.001                                                                     |                           |
| <b>Final R indices</b>                     | 4886 data; $I > 2\sigma(I)$                                               | R1 = 0.0308, wR2 = 0.0822 |
|                                            | all data                                                                  | R1 = 0.0314, wR2 = 0.0826 |
| <b>Weighting scheme</b>                    | $w = 1/[\sigma^2(F_o^2) + (0.0564P)^2]$<br>where $P = (F_o^2 + 2F_c^2)/3$ |                           |
| <b>Absolute structure parameter</b>        | 0.011(4)                                                                  |                           |
| <b>Largest diff. peak and hole</b>         | 0.435 and -1.178 $e\text{\AA}^{-3}$                                       |                           |
| <b>R.M.S. deviation from mean</b>          | 0.153 $e\text{\AA}^{-3}$                                                  |                           |

**Table S12.** Bond lengths ( $\text{\AA}$ ) for complex (S)-15.

|           |            |           |           |
|-----------|------------|-----------|-----------|
| Pd1-C1    | 1.997(6)   | Pd1-O1    | 2.172(4)  |
| Pd1-P1    | 2.1786(12) | Pd1-O2    | 2.205(4)  |
| C1-C10    | 1.385(8)   | C1-C2     | 1.418(7)  |
| C2-C3     | 1.362(9)   | C3-C4     | 1.422(9)  |
| C4-C9     | 1.424(9)   | C4-C5     | 1.429(9)  |
| C5-C6     | 1.382(10)  | C6-C7     | 1.396(11) |
| C7-C8     | 1.379(9)   | C8-C9     | 1.424(9)  |
| C9-C10    | 1.438(8)   | C10-C11   | 1.504(8)  |
| C11-C12   | 1.543(7)   | C11-P1    | 1.857(6)  |
| C12-C13   | 1.523(7)   | C12-C15A  | 1.528(14) |
| C12-C15   | 1.532(17)  | C13-O5    | 1.205(7)  |
| C13-O6    | 1.336(7)   | C14-O6    | 1.451(7)  |
| C15-O3    | 1.205(17)  | C15-O4    | 1.340(16) |
| C16-O4    | 1.456(15)  | C15A-O3A  | 1.205(14) |
| C15A-O4A  | 1.337(13)  | C16A-O4A  | 1.454(14) |
| C17-C18   | 1.396(12)  | C17-C22   | 1.421(12) |
| C17-P1    | 1.809(9)   | C18-C19   | 1.371(13) |
| C19-C20   | 1.401(14)  | C20-C21   | 1.399(14) |
| C21-C22   | 1.398(12)  | C23-C28   | 1.396(13) |
| C23-C24   | 1.397(13)  | C23-P1    | 1.809(8)  |
| C24-C25   | 1.385(11)  | C25-C26   | 1.390(14) |
| C26-C27   | 1.365(14)  | C27-C28   | 1.397(12) |
| C17A-C18A | 1.39       | C17A-C22A | 1.39      |
| C17A-P1   | 1.788(11)  | C18A-C19A | 1.39      |
| C19A-C20A | 1.39       | C20A-C21A | 1.39      |

|           |           |           |           |
|-----------|-----------|-----------|-----------|
| C21A-C22A | 1.39      | C23A-C24A | 1.371(18) |
| C23A-C28A | 1.408(19) | C23A-P1   | 1.836(12) |
| C24A-C25A | 1.391(19) | C25A-C26A | 1.39(2)   |
| C26A-C27A | 1.366(18) | C27A-C28A | 1.401(16) |
| Cl1-O9    | 1.410(10) | Cl1-O7    | 1.425(10) |
| Cl1-O8    | 1.436(8)  | Cl1-O10   | 1.469(9)  |
| Cl1A-O8A  | 1.410(17) | Cl1A-O9A  | 1.426(15) |
| Cl1A-O7A  | 1.438(17) | Cl1A-O10A | 1.455(16) |

**Table s13.** Bond angles (°) for complex (*S*)-**15**.

|               |            |                |            |
|---------------|------------|----------------|------------|
| C1-Pd1-O1     | 95.30(19)  | C1-Pd1-P1      | 79.32(15)  |
| O1-Pd1-P1     | 173.80(12) | C1-Pd1-O2      | 173.14(19) |
| O1-Pd1-O2     | 89.05(15)  | P1-Pd1-O2      | 96.60(11)  |
| C10-C1-C2     | 120.2(5)   | C10-C1-Pd1     | 121.9(4)   |
| C2-C1-Pd1     | 117.7(4)   | C3-C2-C1       | 120.3(5)   |
| C2-C3-C4      | 121.3(5)   | C3-C4-C9       | 119.3(5)   |
| C3-C4-C5      | 121.0(6)   | C9-C4-C5       | 119.8(6)   |
| C6-C5-C4      | 119.6(7)   | C5-C6-C7       | 121.1(6)   |
| C8-C7-C6      | 120.2(7)   | C7-C8-C9       | 121.3(7)   |
| C8-C9-C4      | 118.0(5)   | C8-C9-C10      | 123.6(6)   |
| C4-C9-C10     | 118.3(6)   | C1-C10-C9      | 120.5(5)   |
| C1-C10-C11    | 118.3(5)   | C9-C10-C11     | 121.2(5)   |
| C10-C11-C12   | 116.4(4)   | C10-C11-P1     | 99.9(4)    |
| C12-C11-P1    | 112.4(3)   | C13-C12-C15A   | 109.8(9)   |
| C13-C12-C15   | 107.4(11)  | C13-C12-C11    | 110.3(4)   |
| C15A-C12-C11  | 105.6(11)  | C15-C12-C11    | 116.0(13)  |
| O5-C13-O6     | 125.1(5)   | O5-C13-C12     | 124.9(5)   |
| O6-C13-C12    | 110.0(4)   | O3-C15-O4      | 124.(2)    |
| O3-C15-C12    | 125.(2)    | O4-C15-C12     | 110.3(15)  |
| C15-O4-C16    | 116.6(12)  | O3A-C15A-O4A   | 124.4(17)  |
| O3A-C15A-C12  | 124.3(18)  | O4A-C15A-C12   | 111.3(12)  |
| C15A-O4A-C16A | 115.9(11)  | C18-C17-C22    | 119.9(8)   |
| C18-C17-P1    | 125.4(10)  | C22-C17-P1     | 114.7(10)  |
| C19-C18-C17   | 120.7(10)  | C18-C19-C20    | 119.8(10)  |
| C21-C20-C19   | 120.6(9)   | C22-C21-C20    | 119.8(9)   |
| C21-C22-C17   | 118.9(10)  | C28-C23-C24    | 120.0(7)   |
| C28-C23-P1    | 118.3(7)   | C24-C23-P1     | 121.7(7)   |
| C25-C24-C23   | 120.2(8)   | C24-C25-C26    | 119.3(8)   |
| C27-C26-C25   | 121.1(8)   | C26-C27-C28    | 120.5(9)   |
| C23-C28-C27   | 119.0(8)   | C18A-C17A-C22A | 120.0      |

|                |            |                |           |
|----------------|------------|----------------|-----------|
| C18A-C17A-P1   | 117.7(12)  | C22A-C17A-P1   | 122.2(12) |
| C19A-C18A-C17A | 120.0      | C18A-C19A-C20A | 120.0     |
| C21A-C20A-C19A | 120.0      | C22A-C21A-C20A | 120.0     |
| C21A-C22A-C17A | 120.0      | C24A-C23A-C28A | 120.9(12) |
| C24A-C23A-P1   | 119.6(12)  | C28A-C23A-P1   | 119.5(10) |
| C23A-C24A-C25A | 118.9(14)  | C26A-C25A-C24A | 120.7(15) |
| C27A-C26A-C25A | 120.8(14)  | C26A-C27A-C28A | 119.6(13) |
| C27A-C28A-C23A | 119.1(12)  | C13-O6-C14     | 115.5(5)  |
| O9-C11-O7      | 111.5(8)   | O9-C11-O8      | 110.4(7)  |
| O7-C11-O8      | 108.8(7)   | O9-C11-O10     | 107.9(7)  |
| O7-C11-O10     | 109.9(7)   | O8-C11-O10     | 108.2(6)  |
| O8A-C11A-O9A   | 113.4(15)  | O8A-C11A-O7A   | 116.2(16) |
| O9A-C11A-O7A   | 105.3(13)  | O8A-C11A-O10A  | 106.9(15) |
| O9A-C11A-O10A  | 109.0(12)  | O7A-C11A-O10A  | 105.7(15) |
| C17-P1-C23     | 106.8(6)   | C17A-P1-C23A   | 105.9(9)  |
| C17A-P1-C11    | 112.6(5)   | C17-P1-C11     | 111.8(4)  |
| C23-P1-C11     | 97.4(4)    | C23A-P1-C11    | 111.9(6)  |
| C17A-P1-Pd1    | 114.7(6)   | C17-P1-Pd1     | 112.8(4)  |
| C23-P1-Pd1     | 123.3(3)   | C23A-P1-Pd1    | 108.3(5)  |
| C11-P1-Pd1     | 103.51(16) |                |           |
